# Supplementary material for: Spirochromone-chalcone conjugates as antitubercular agents: synthesis, bio evaluation and molecular modeling studies
Source: Royal Society of Chemistry journal article supplement (doi:10.1039/c5ra21737g), 2015-01-01
Supplement: c5ra21737g1.pdf [file c5ra21737g1.pdf]

## Spirochromone-chalcone conjugates as antitubercular agents: synthesis, bio evaluation and molecular modeling studies.

M. Mujahid,<sup>a</sup> P. Yogeewari,<sup>b</sup> D. Sriram,<sup>b</sup> U. M. V. Basavanag,<sup>c</sup> Erik Díaz-Cervantes,<sup>c</sup> Luis Córdoba-Bahena,<sup>c</sup> Juvencio Robles,<sup>c</sup> R. G. Gonnade,<sup>a</sup> M. Karthikeyan,<sup>a</sup> Renu Vyas,<sup>a</sup> M. Muthukrishnan<sup>\*a</sup>

<sup>a</sup>CSIR-National Chemical Laboratory, Dr. Homi Bhabha Road, Pune 411 008, India

<sup>b</sup>Medicinal Chemistry & Antimycobacterial Research Laboratory, Pharmacy Group, Birla Institute of Technology & Science – Pilani, Hyderabad Campus, Jawahar Nagar, Hyderabad, India

<sup>c</sup>Departamento de Química y Departamento de Farmacia, Universidad de Guanajuato, Noria Alta S/N, Col. Noria Alta, C.P. 36050, Guanajuato, Gto, Mexico

### Supplementary Data

#### Single crystal X-ray data of compound 4f: (CCDC 1045946)

X-ray intensity data measurements of compound **4f** was carried out on a Bruker SMART APEX II CCD diffractometer with graphite-monochromatized (MoK $\alpha$ = 0.71073 Å) radiation at 296 (2) K. The X-ray generator was operated at 50 kV and 30 mA. A preliminary set of cell constants and an orientation matrix were calculated from 277 reflections harvested from three sets of 36 frames. Data were collected with  $\omega$  scan width of 0.5° at eight different settings of  $\varphi$  and  $2\theta$  with a frame time of 10 sec keeping the sample-to-detector distance fixed at 5.00 cm. The X-ray data collection was monitored by APEX2 program (Bruker, 2006).<sup>1</sup> Crystal data of **4f**. C<sub>24</sub>H<sub>24</sub>NO<sub>5</sub>, M=392.43, colorless plate, 0.54 x 0.42 x 0.21 mm<sup>3</sup>, monoclinic, space group *P*2<sub>1</sub>/*C*, *a* = 7.9447(10), *b* = 19.588(2), *c* = 12.7483(14) Å,  $\beta$  = 97.927(5)°, *V* = 1964.9(4) Å<sup>3</sup>, *Z* = 4, *T* = 296(2) K,  $2\theta_{\max}$ =56.66°, *D*<sub>calc</sub> (g cm<sup>-3</sup>) = 1.327, *F*(000) = 832,  $\mu$  (mm<sup>-1</sup>) = 0.092, 18612 reflections collected, 4865 unique reflections (*R*<sub>int</sub>=0.0510), 3453 observed (*I* > 2 $\sigma$ (*I*)) reflections, multi-scan absorption correction, *T*<sub>min</sub> = 0.952, *T*<sub>max</sub> = 0.981, 265 refined parameters, *S* = 1.041, *R*1=0.0443, *wR*2=0.1077 (all data *R* = 0.0680, *wR*2 = 0.1211), maximum and minimum residual electron densities;  $\Delta\rho_{\max}$  = 0.26,  $\Delta\rho_{\min}$  = -0.17 (eÅ<sup>-3</sup>). All the data were corrected for Lorentzian, polarization and absorption effects using SAINT and SADABS programs (Bruker, 2006). SHELX-97 was used for structure solution and full matrix least-squares refinement on *F*<sup>2</sup>.<sup>2</sup> Hydrogen atoms were placed in geometrically idealized position and constrained to ride on their parent atoms.

#### References

- (1) Bruker (2006). *APEX2*, *SAINT* and *SADABS*. Bruker AXS Inc., Madison, Wisconsin, USA.
- (2) G. M. Sheldrick, *Acta Crystallogr.*, 2008, **A64**, 112.

## Analytical data

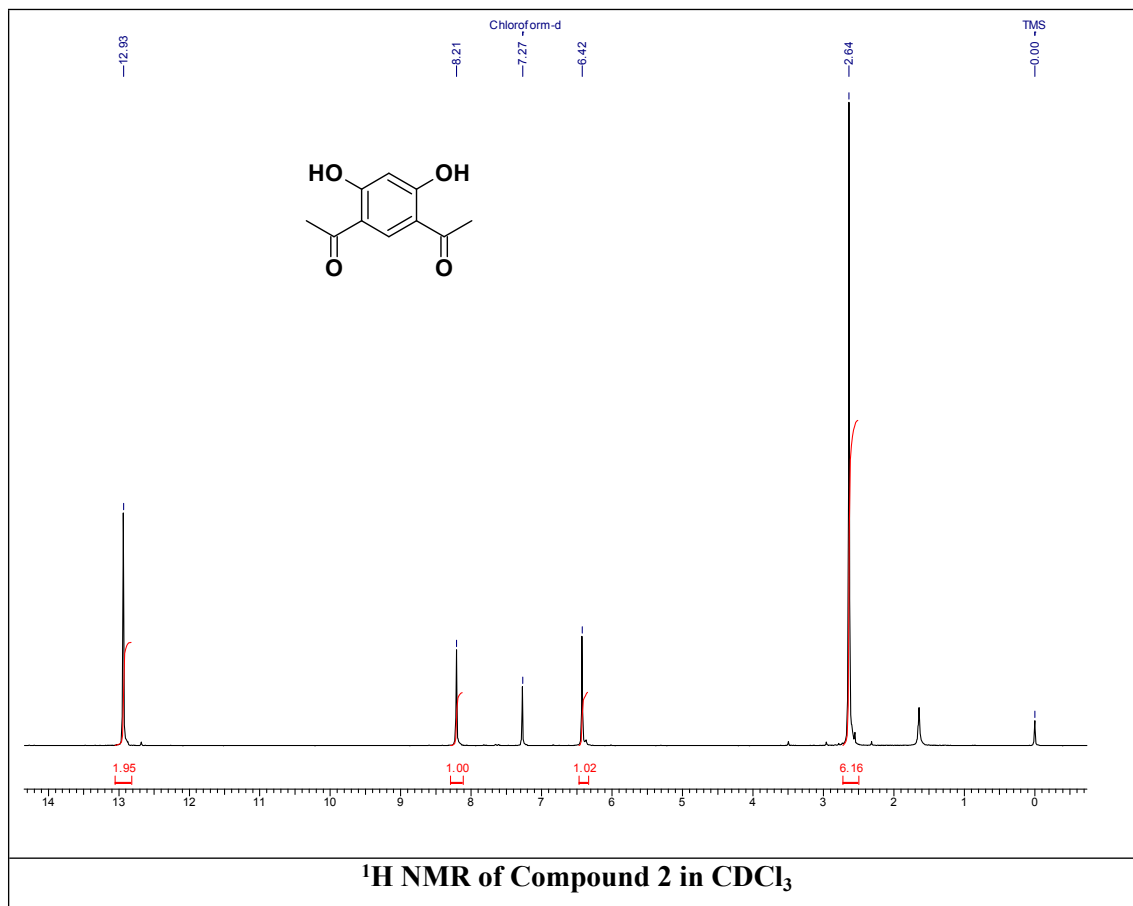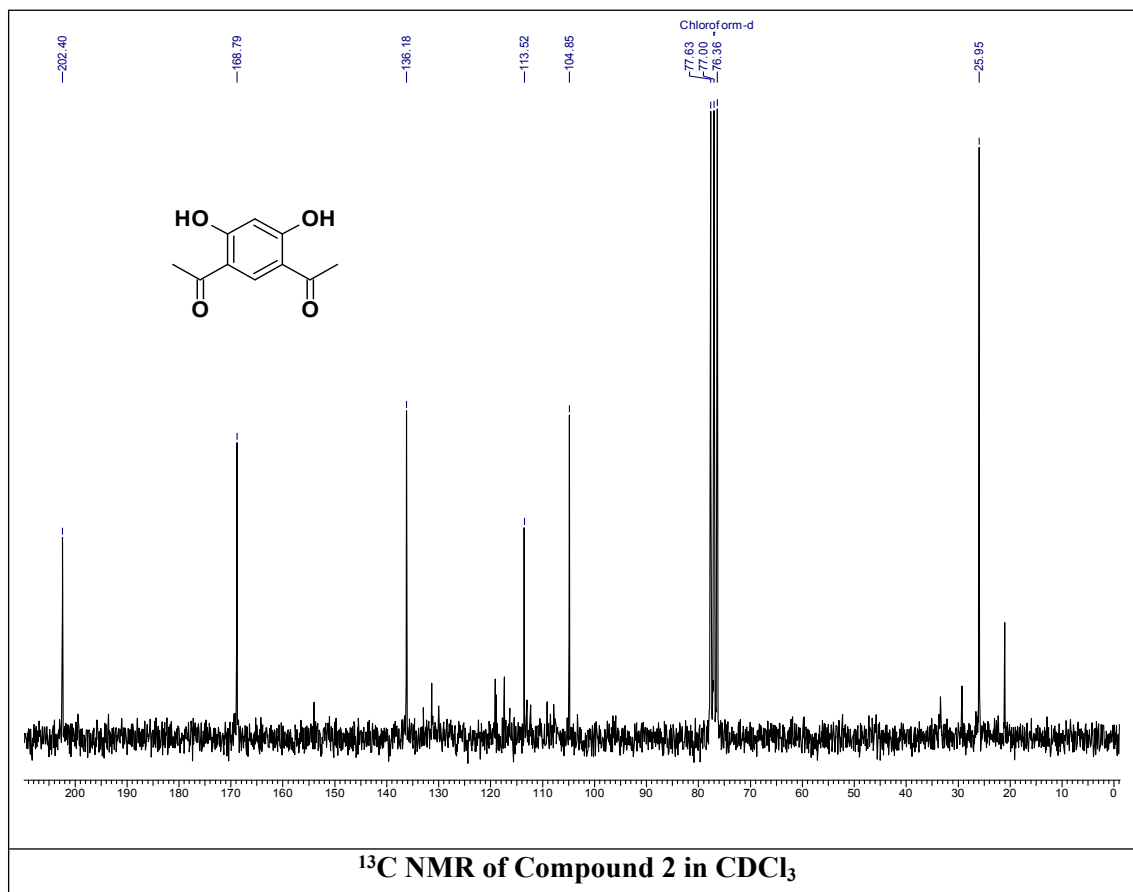

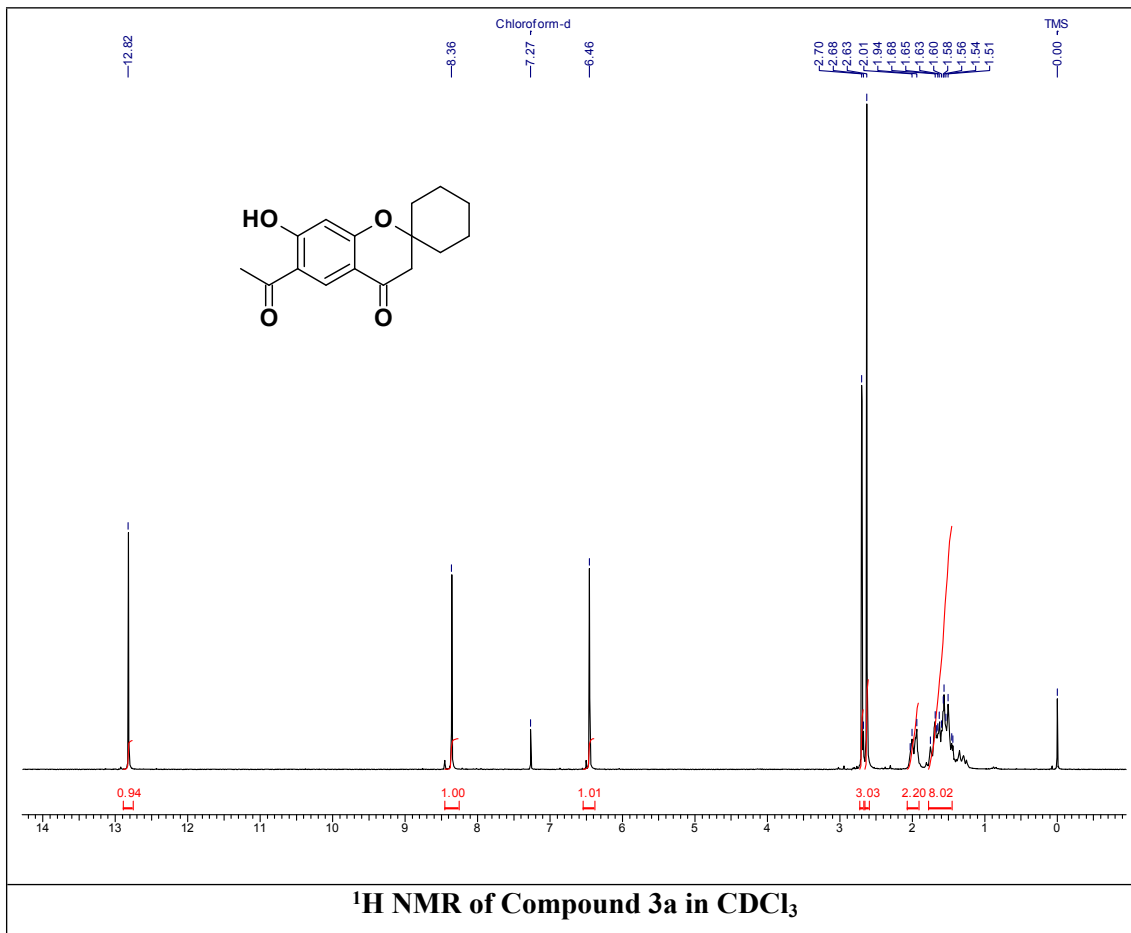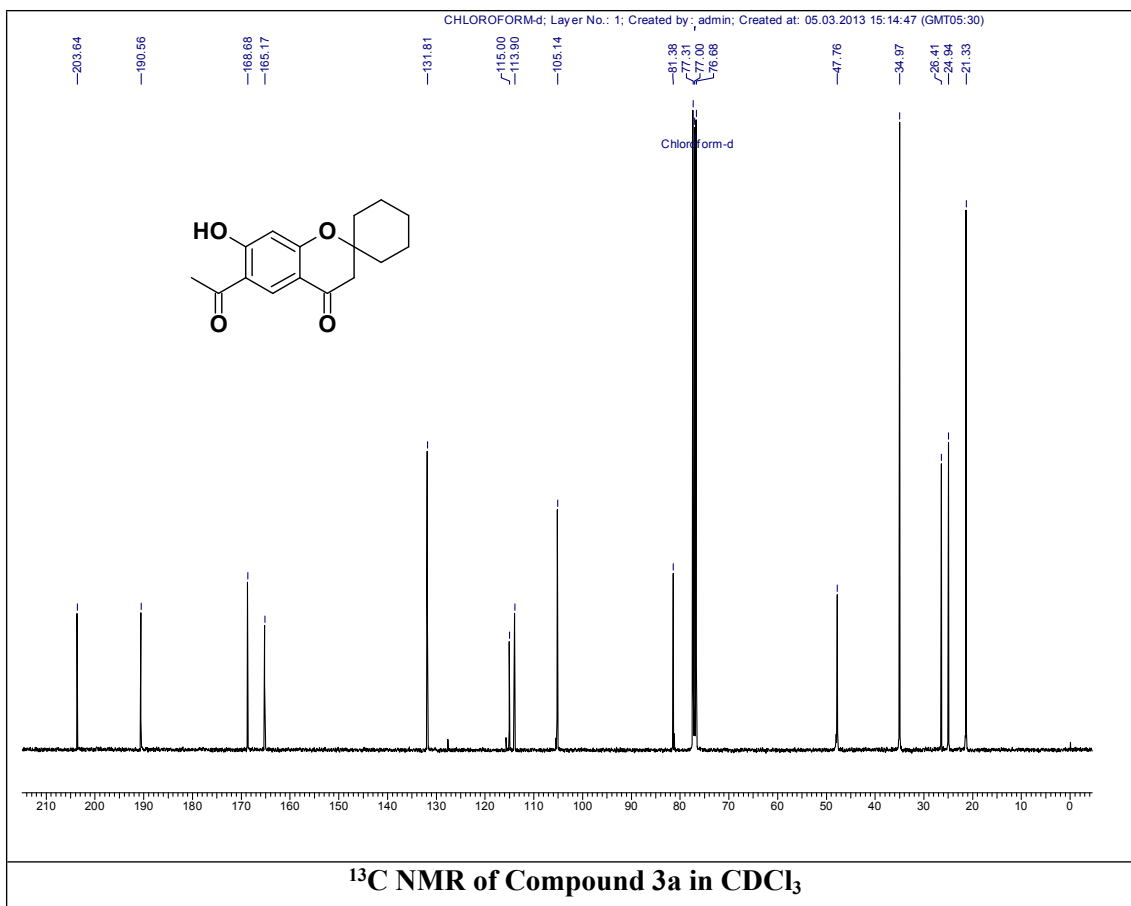

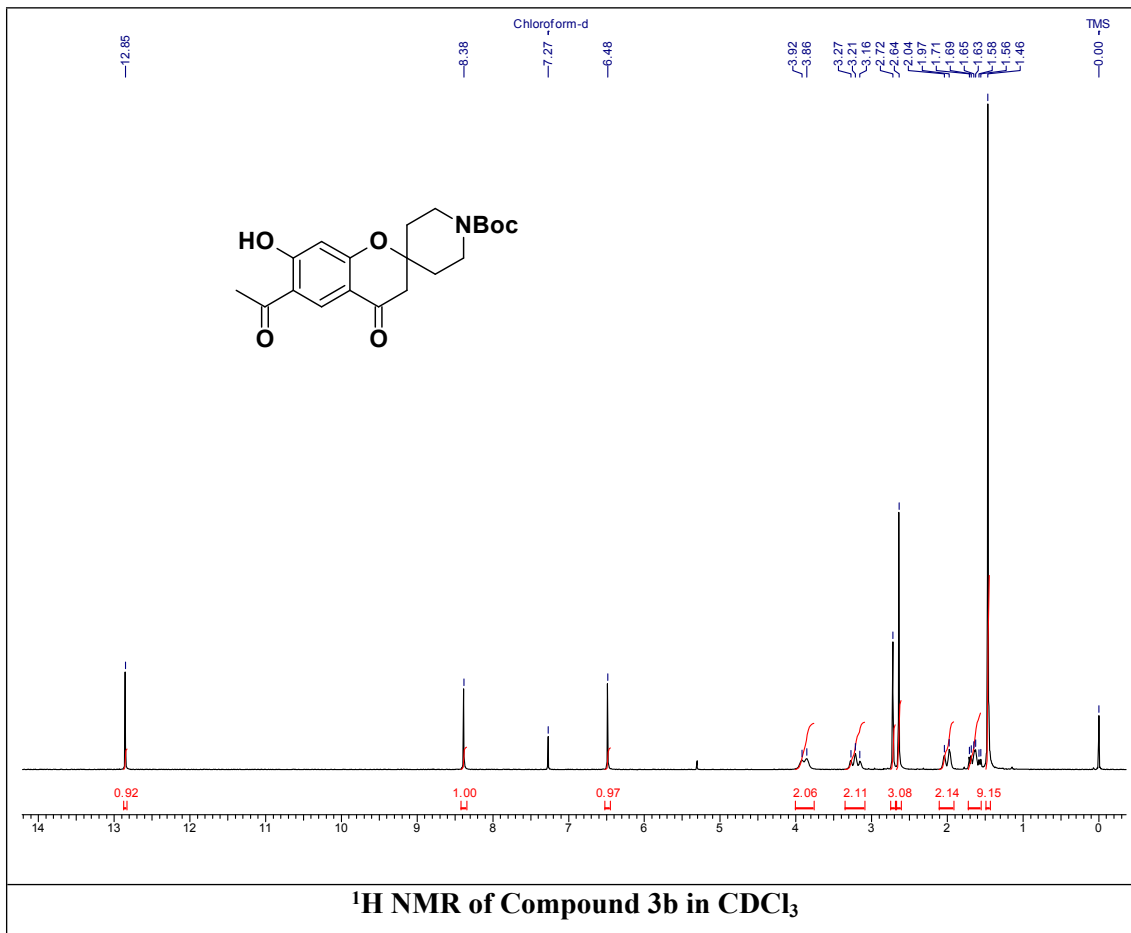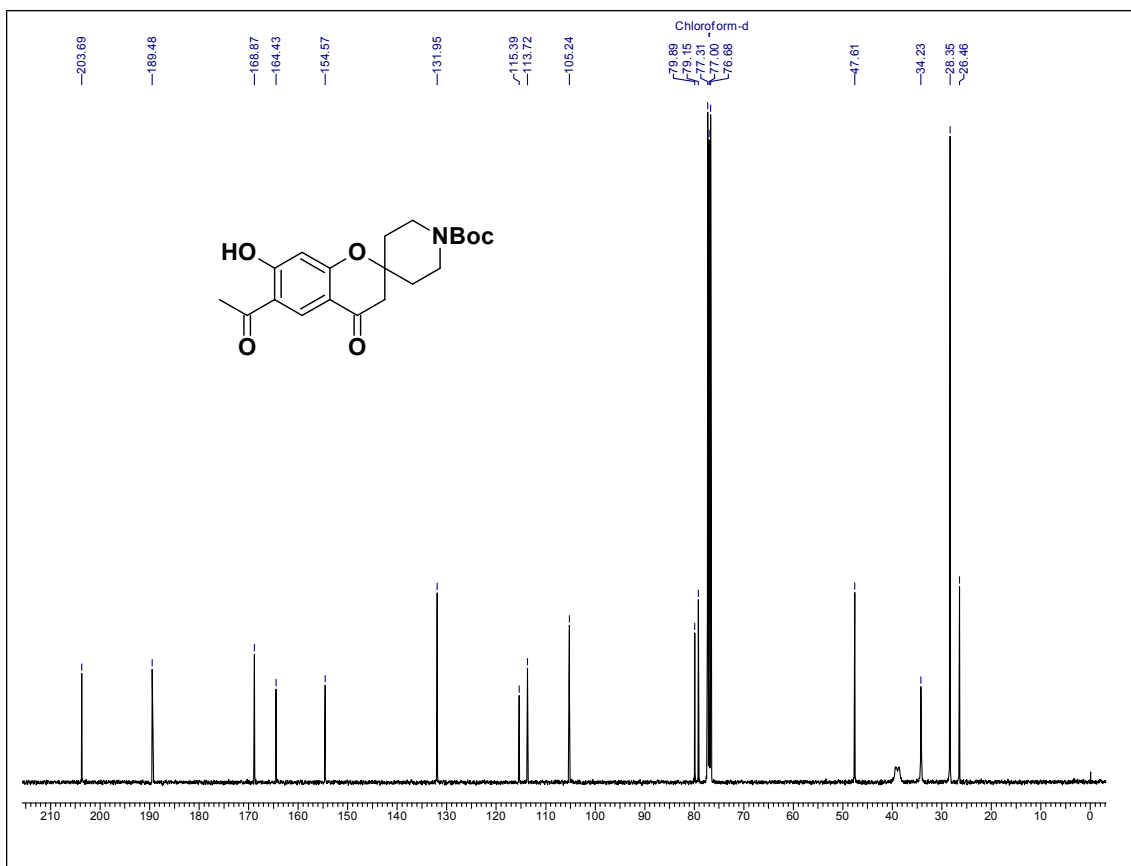

### <sup>13</sup>C NMR of Compound 3b in CDCl<sub>3</sub>

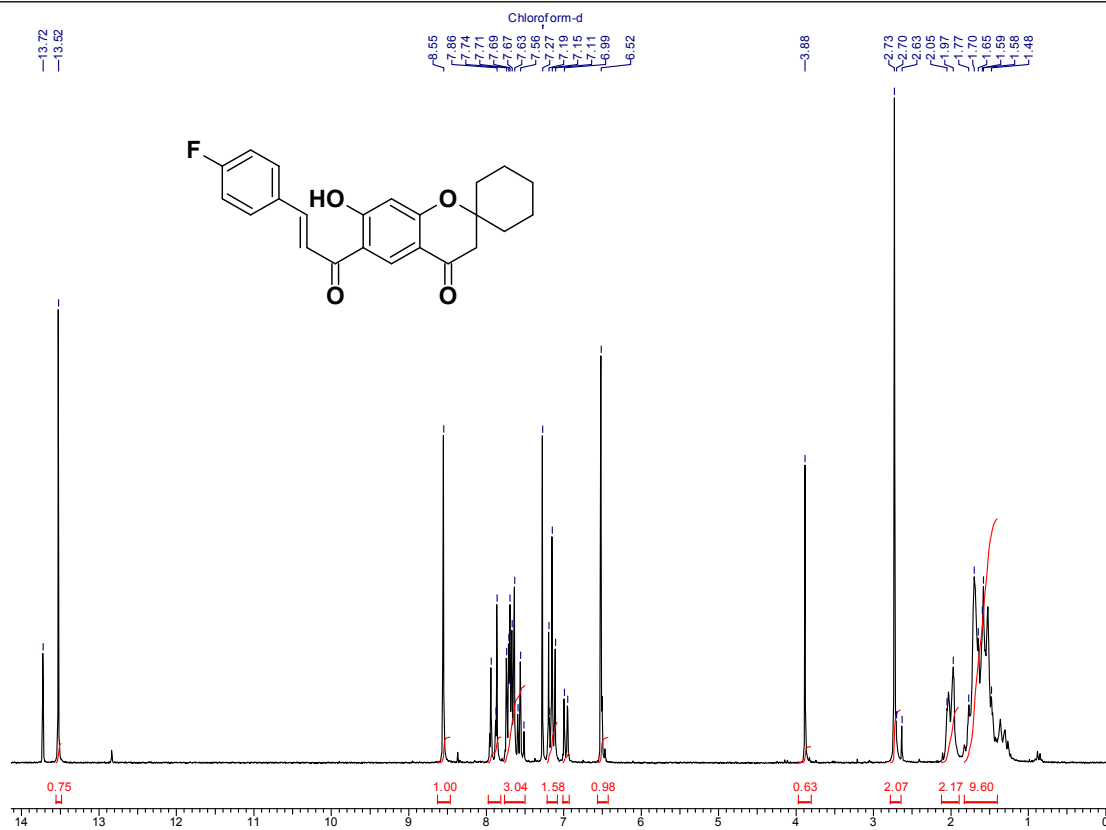

### <sup>1</sup>H NMR of Compound 4a in CDCl<sub>3</sub>

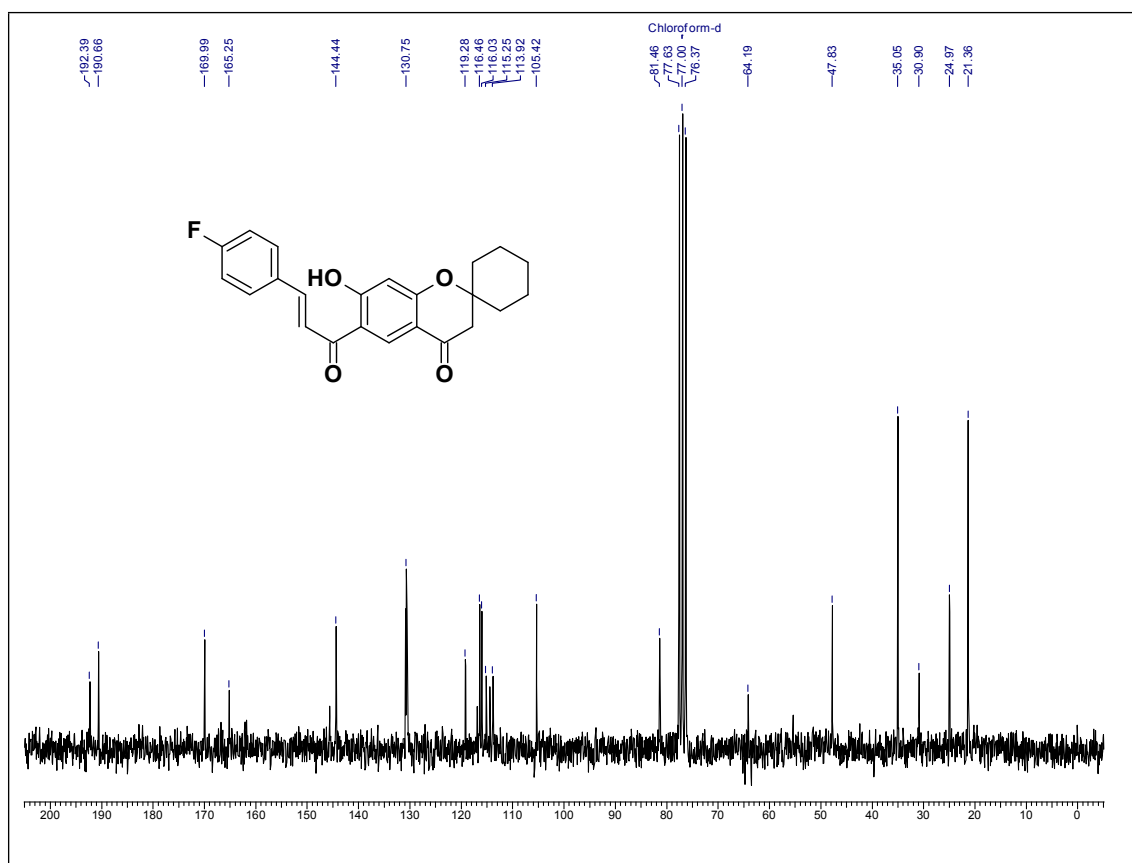

**$^{13}\text{C}$  NMR of Compound 4a in  $\text{CDCl}_3$**

SB-1#214 RT: 0.95 AV: 1 NL: 1.57E8  
T: FTMS + p ESI Full ms [100.00-1500.00]

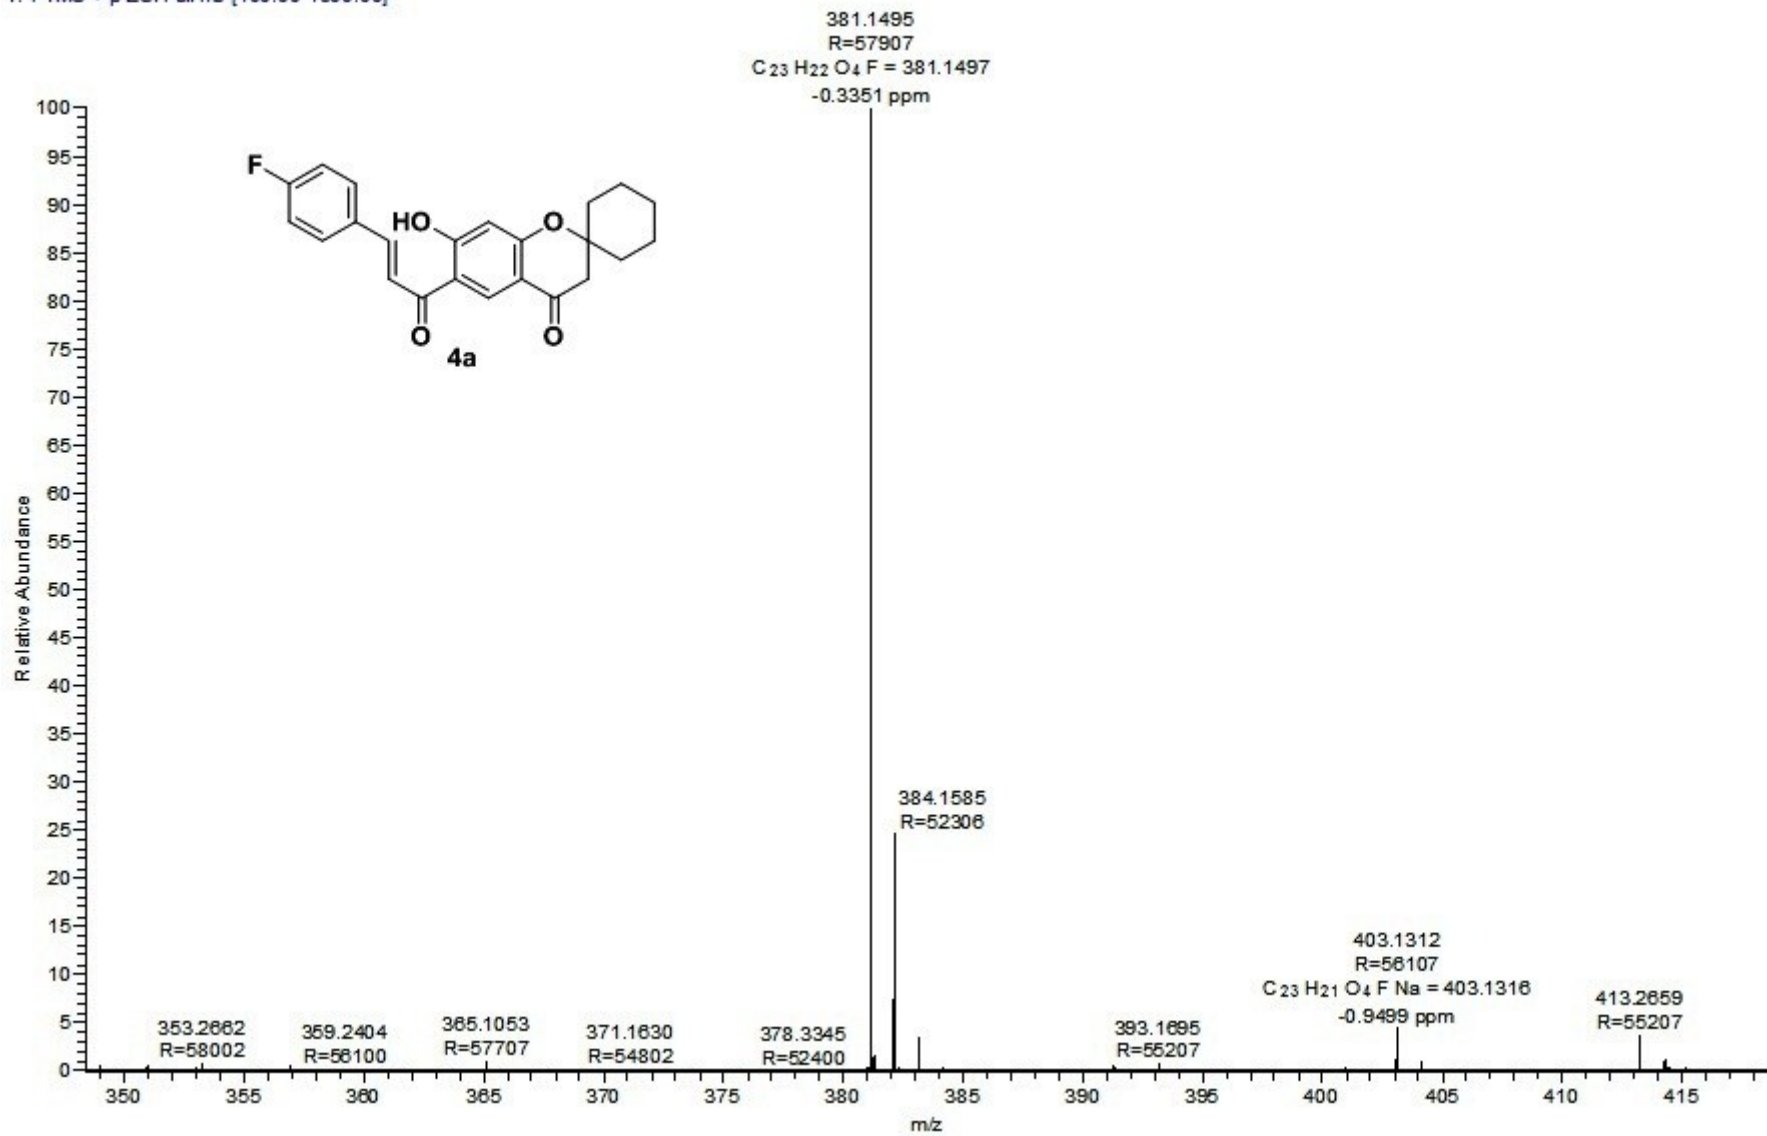

HRMS of Compound 4a

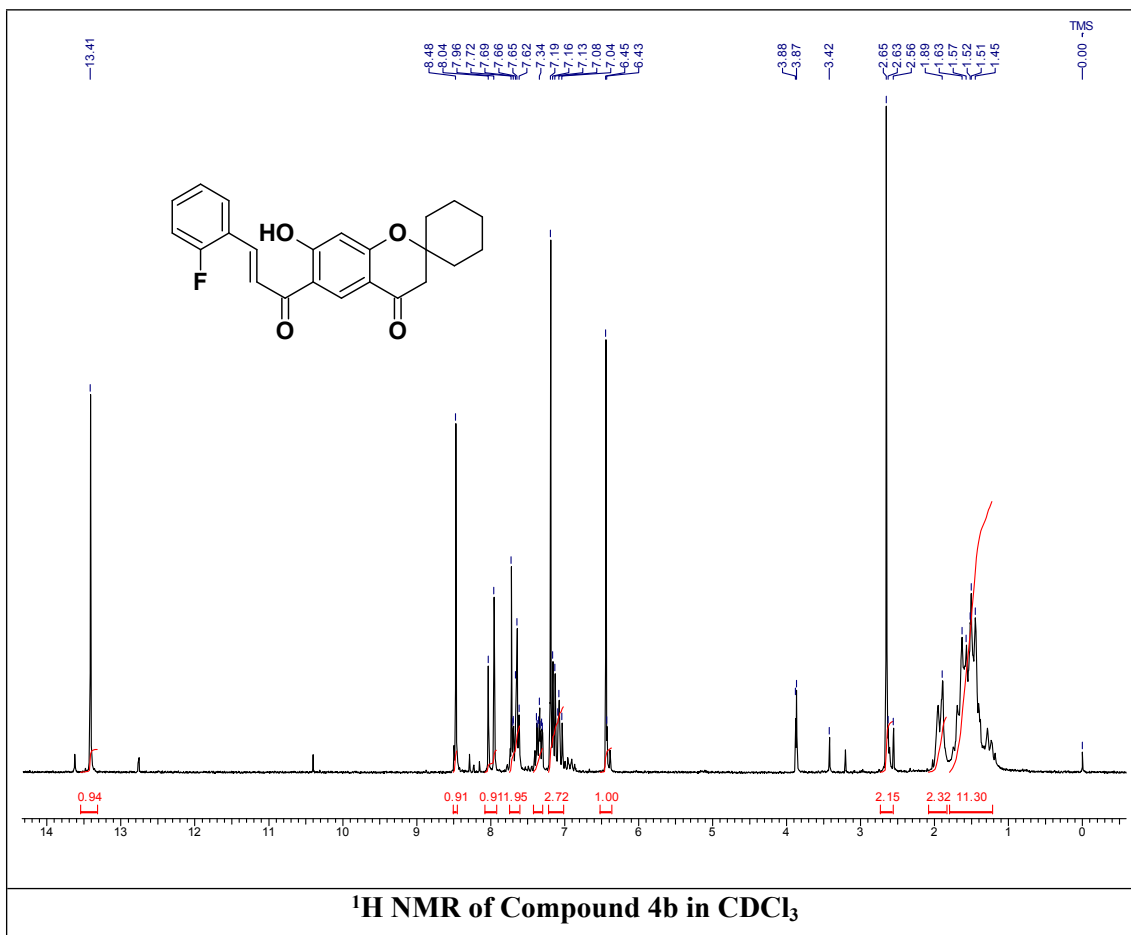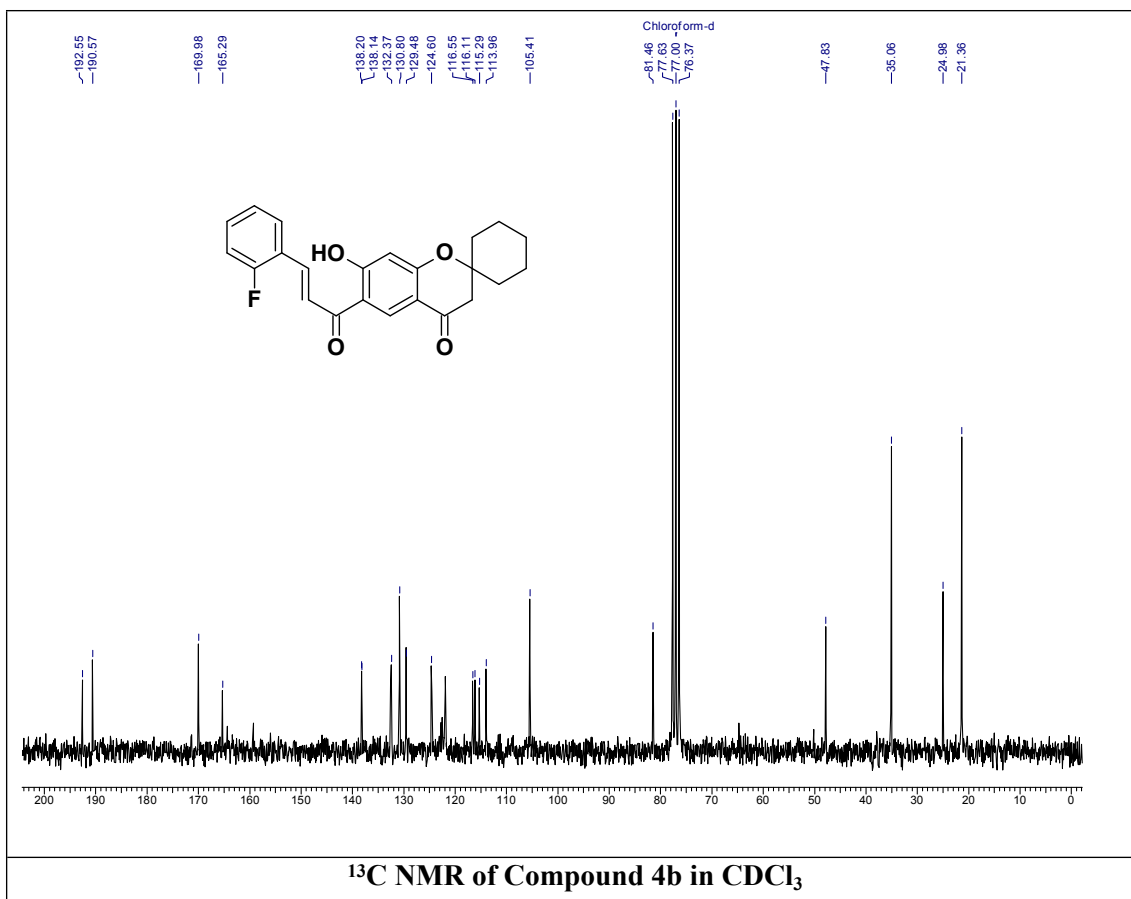



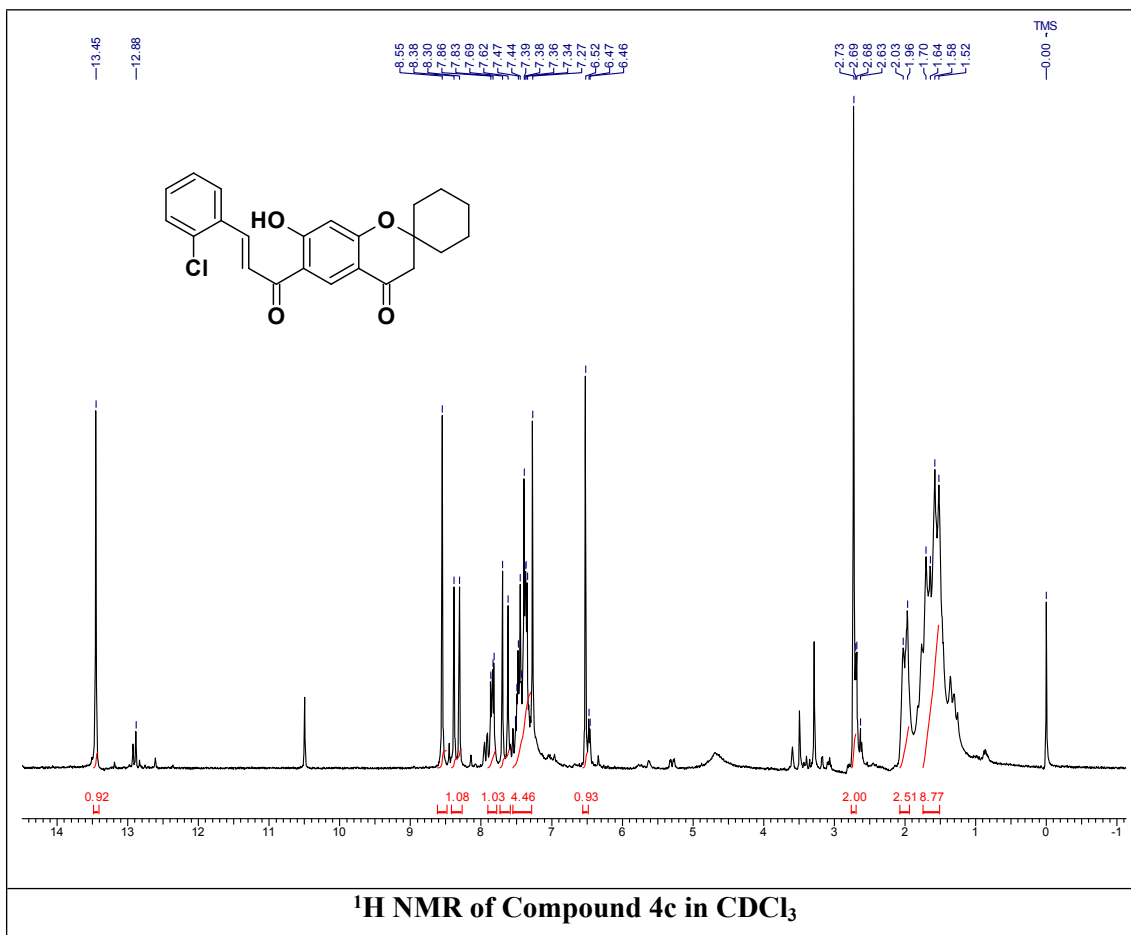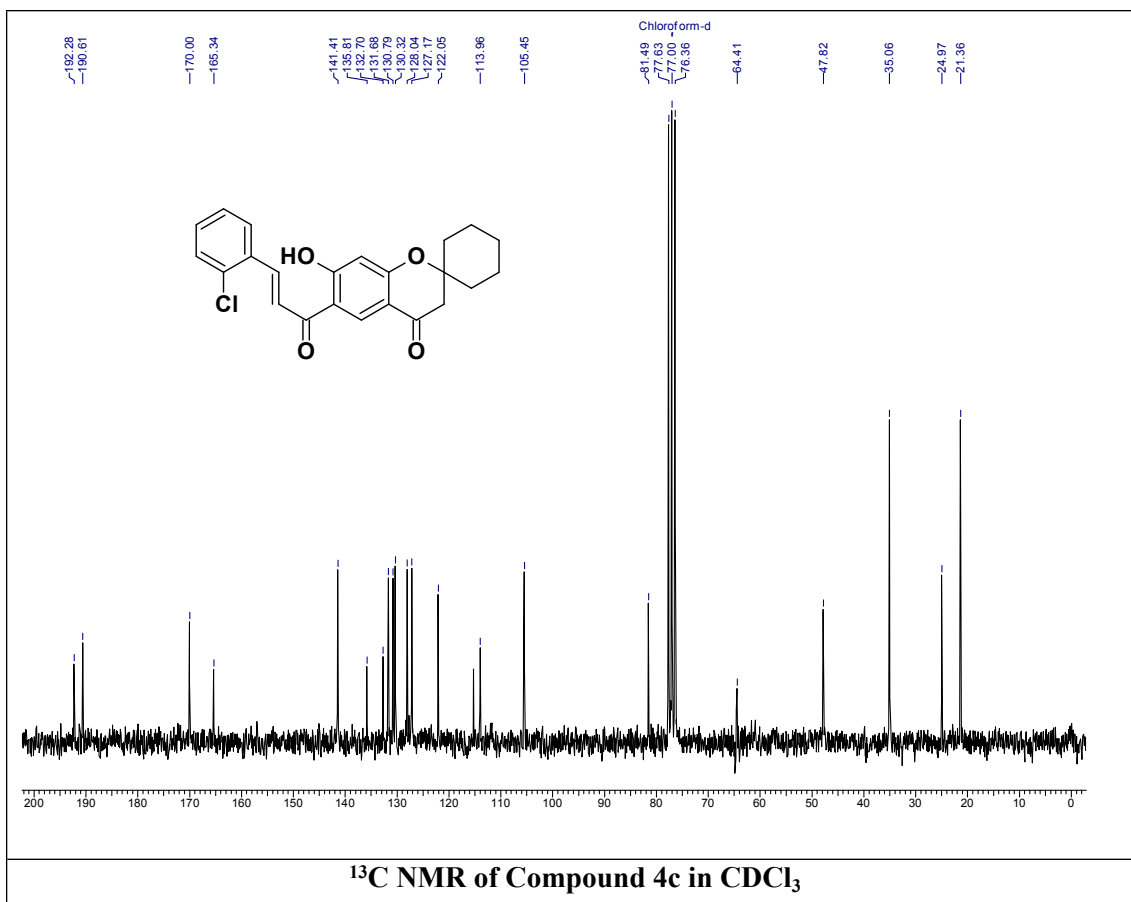

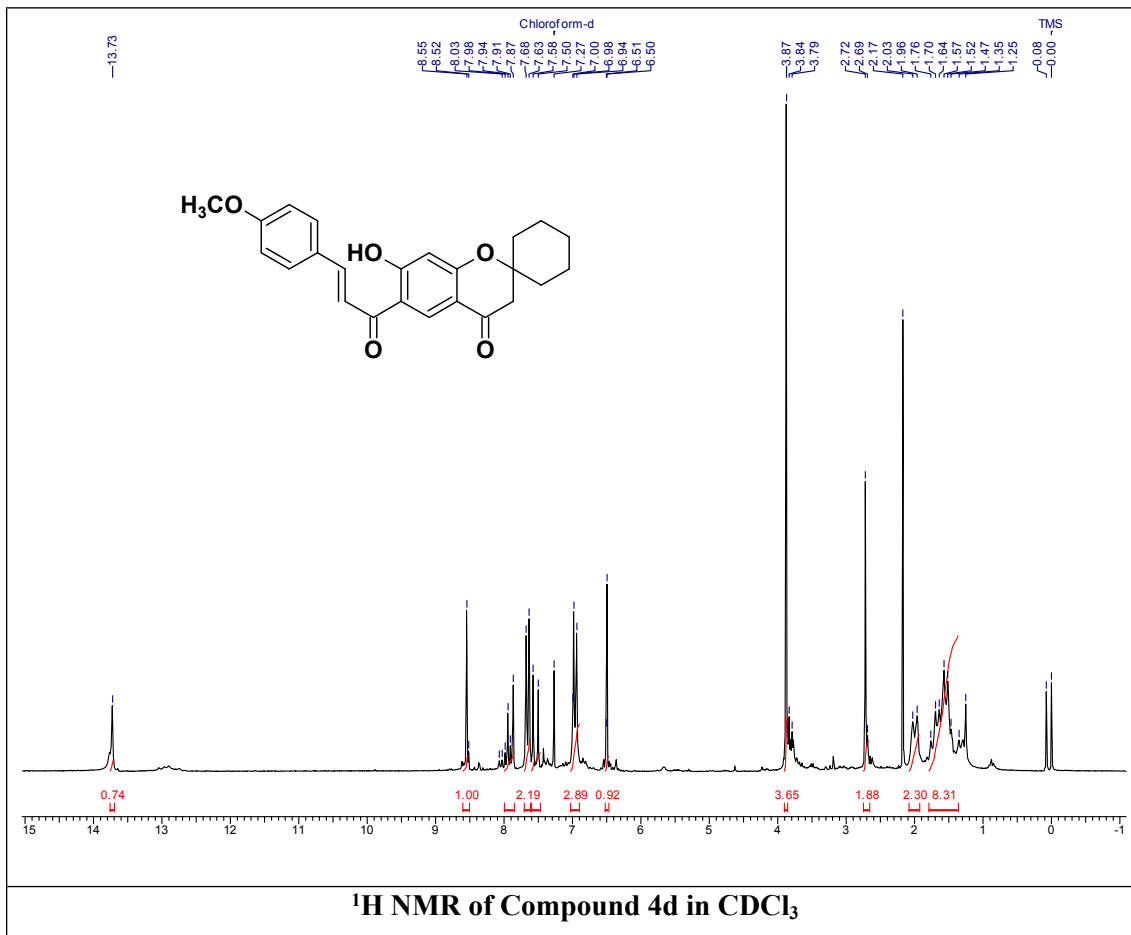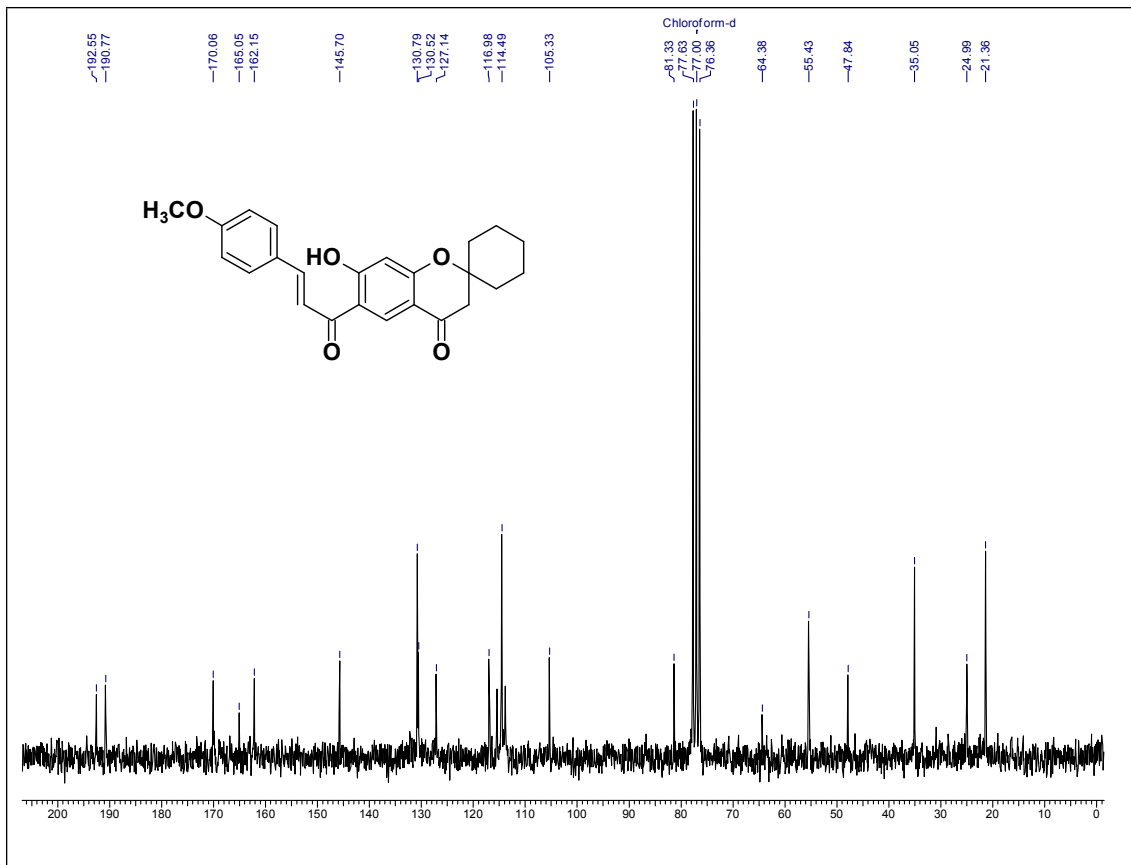

**$^{13}\text{C}$  NMR of Compound 4d in  $\text{CDCl}_3$**

SB-4\_150916114856 #270 RT: 1.20 AV: 1 NL: 1.00E8  
T: FTMS + p ESI Full ms [100.00-1500.00]

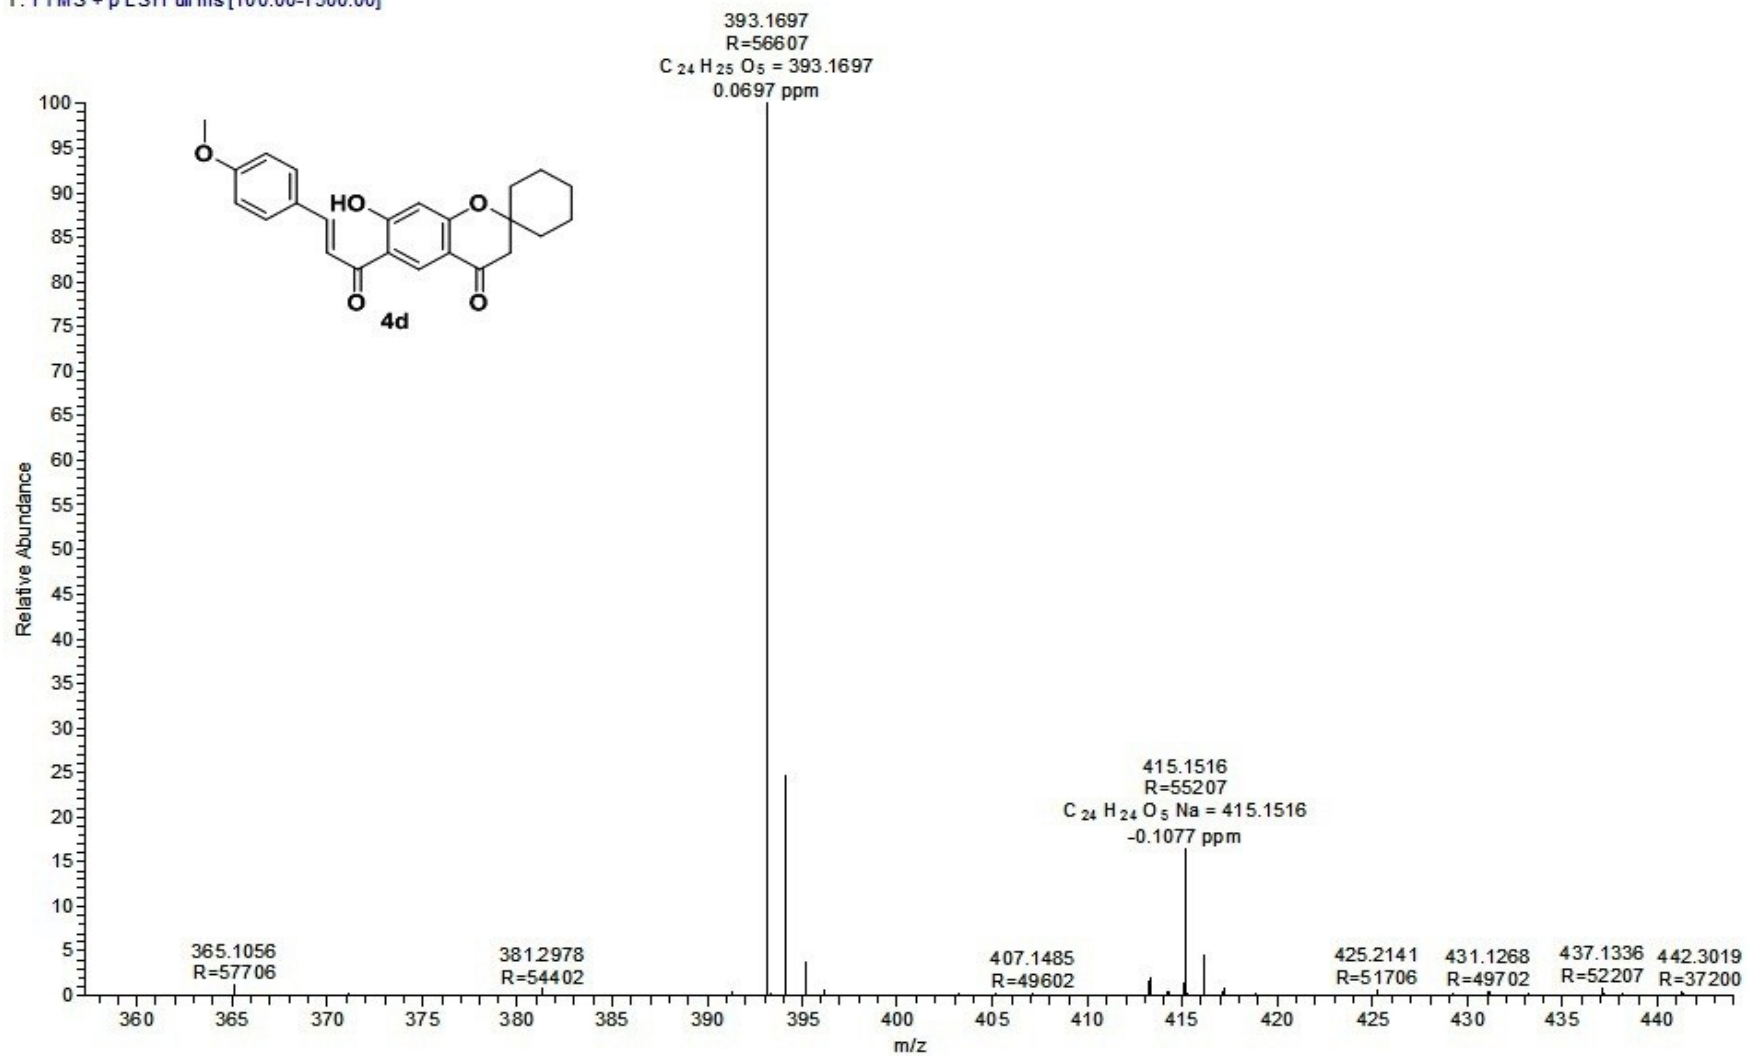

HRMS of Compound 4d



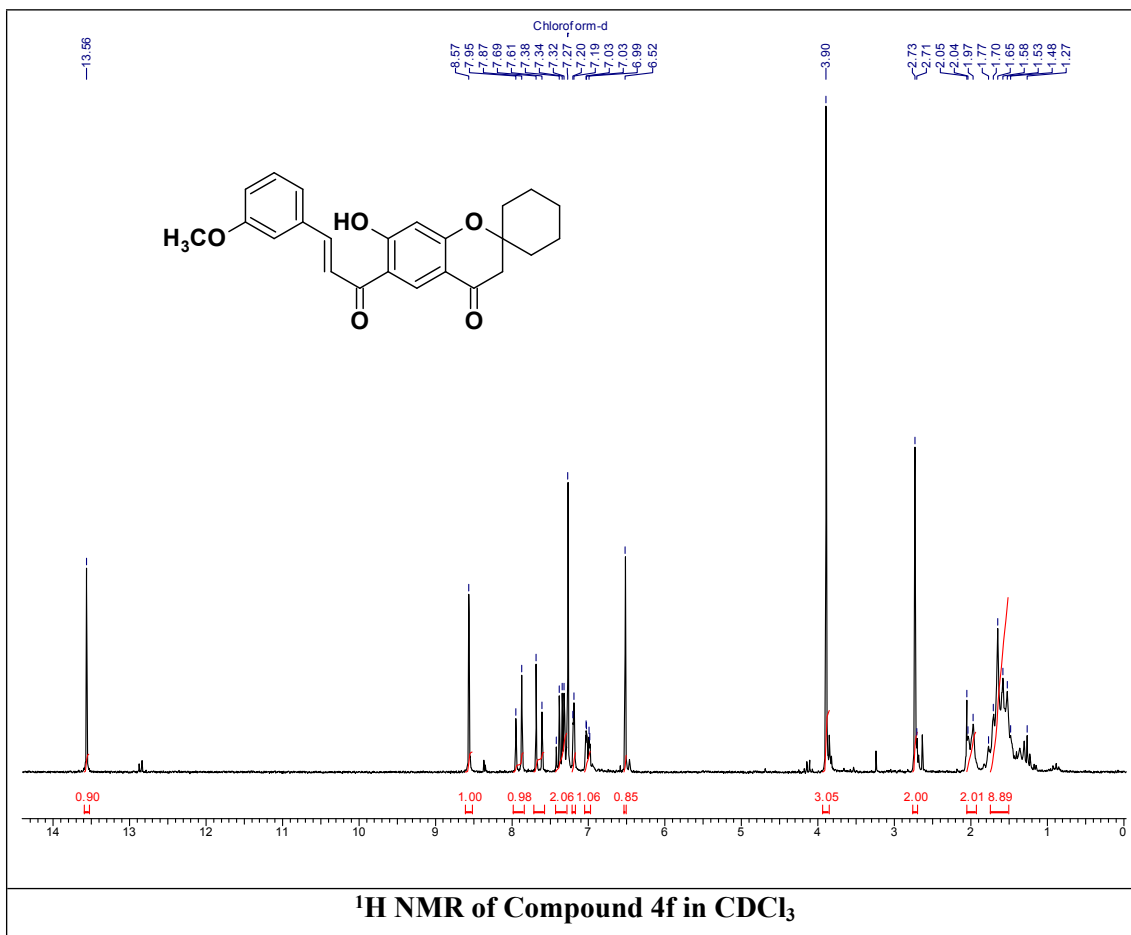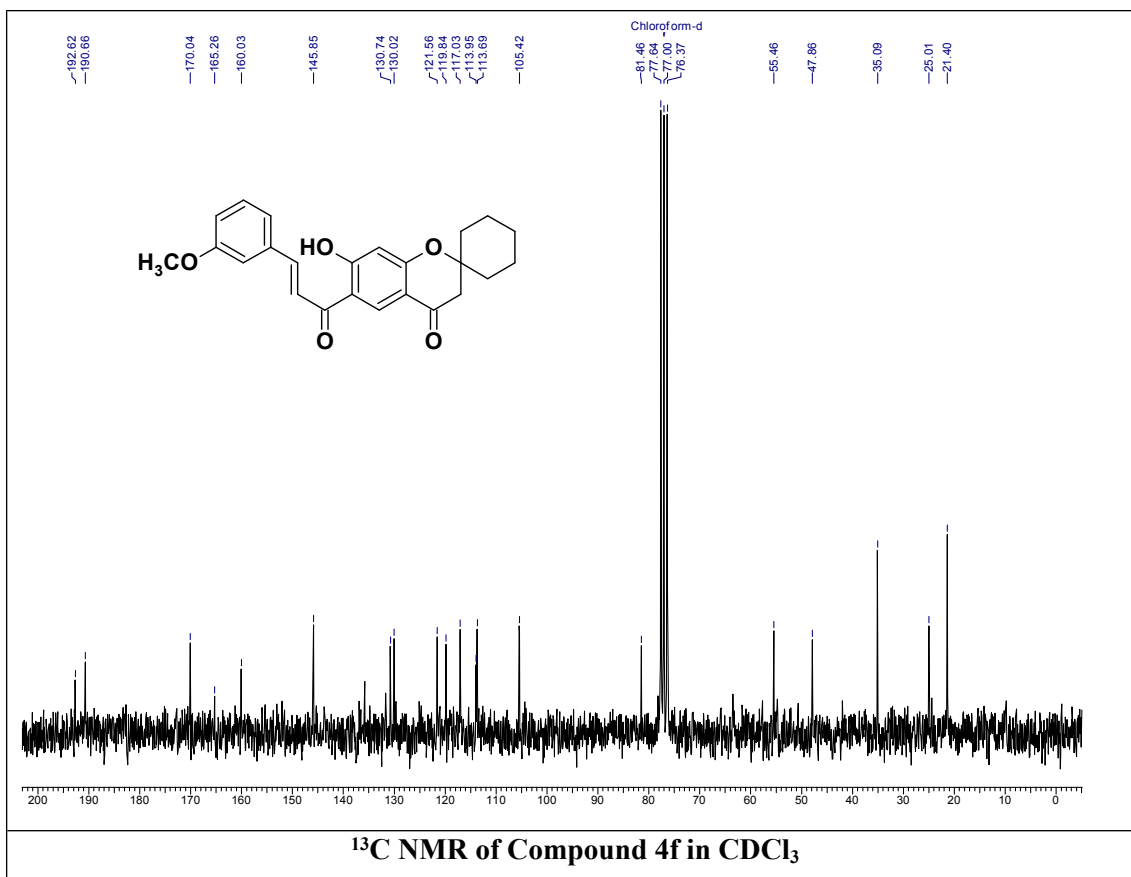

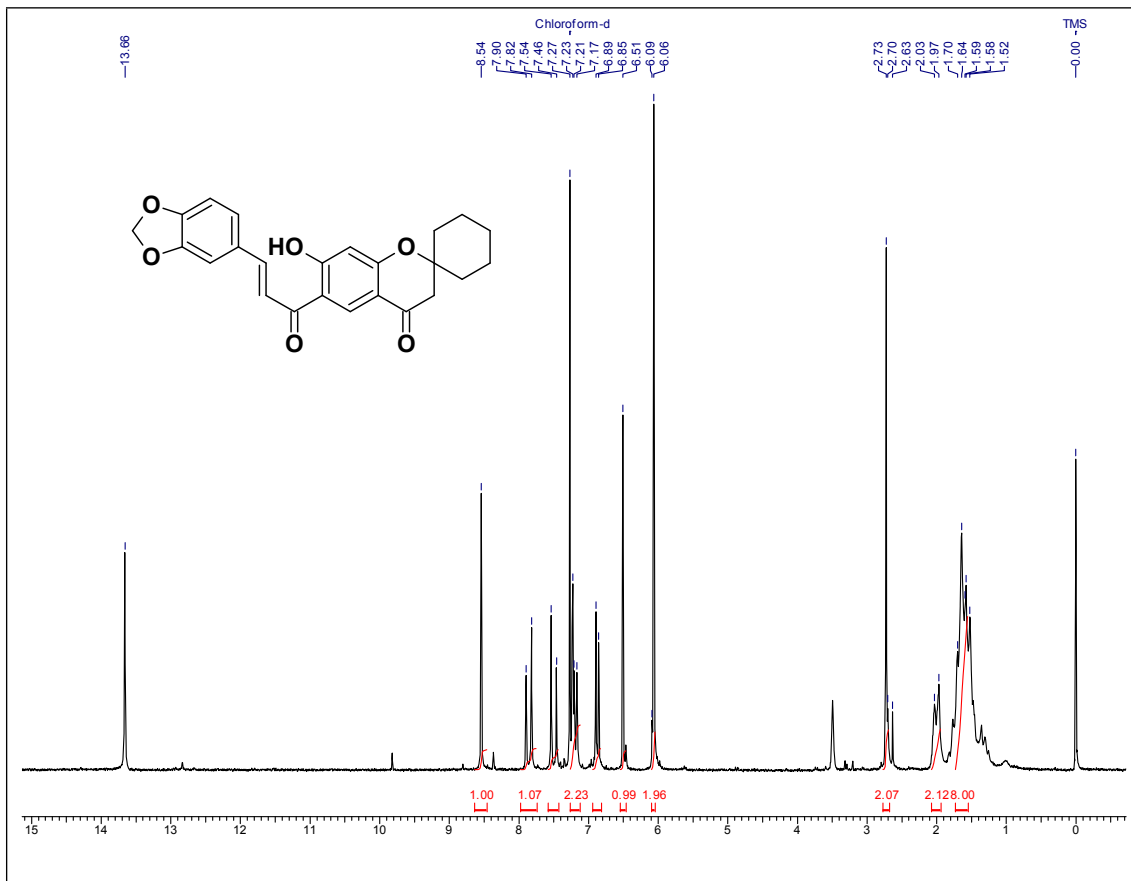

**<sup>1</sup>H NMR of Compound 4g in CDCl<sub>3</sub>**

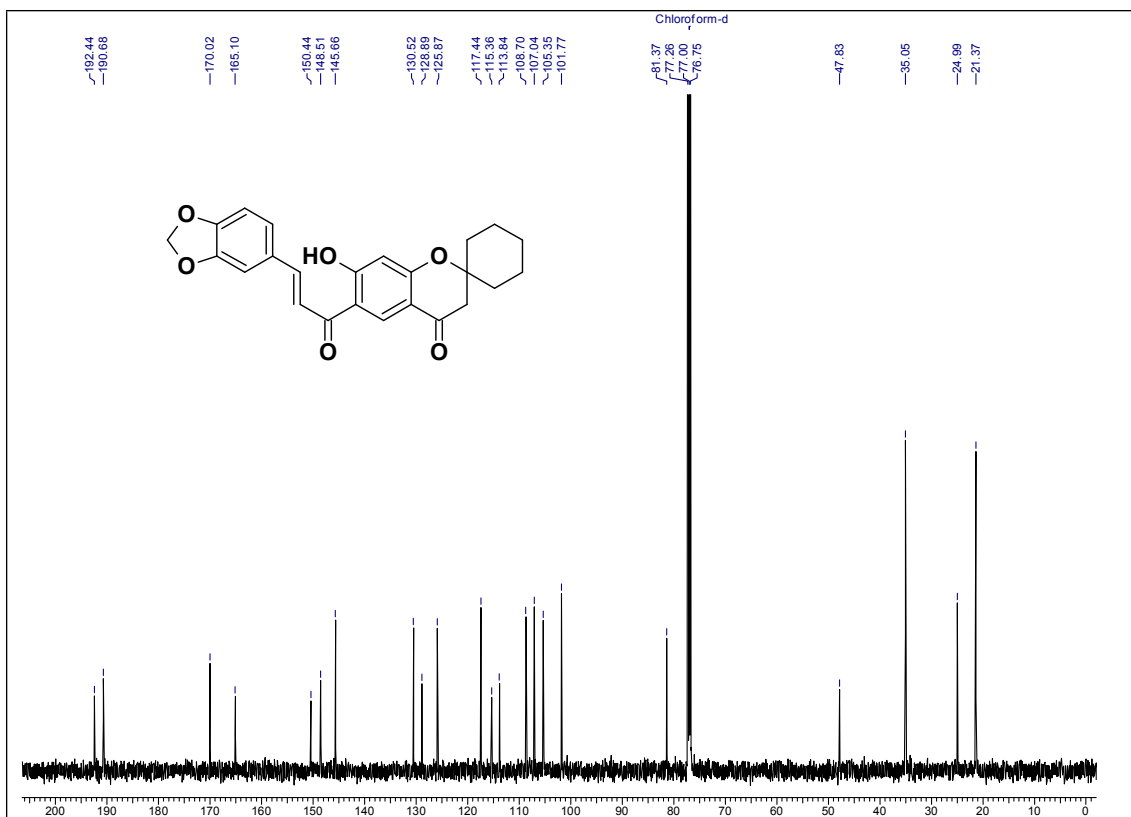

**<sup>13</sup>C NMR of Compound 4g in CDCl<sub>3</sub>**





SB-7\_150916115827 #253 RT: 1.12 AV: 1 NL: 2.61E7  
T: FTMS + p E SI Full ms [100.00-1500.00]

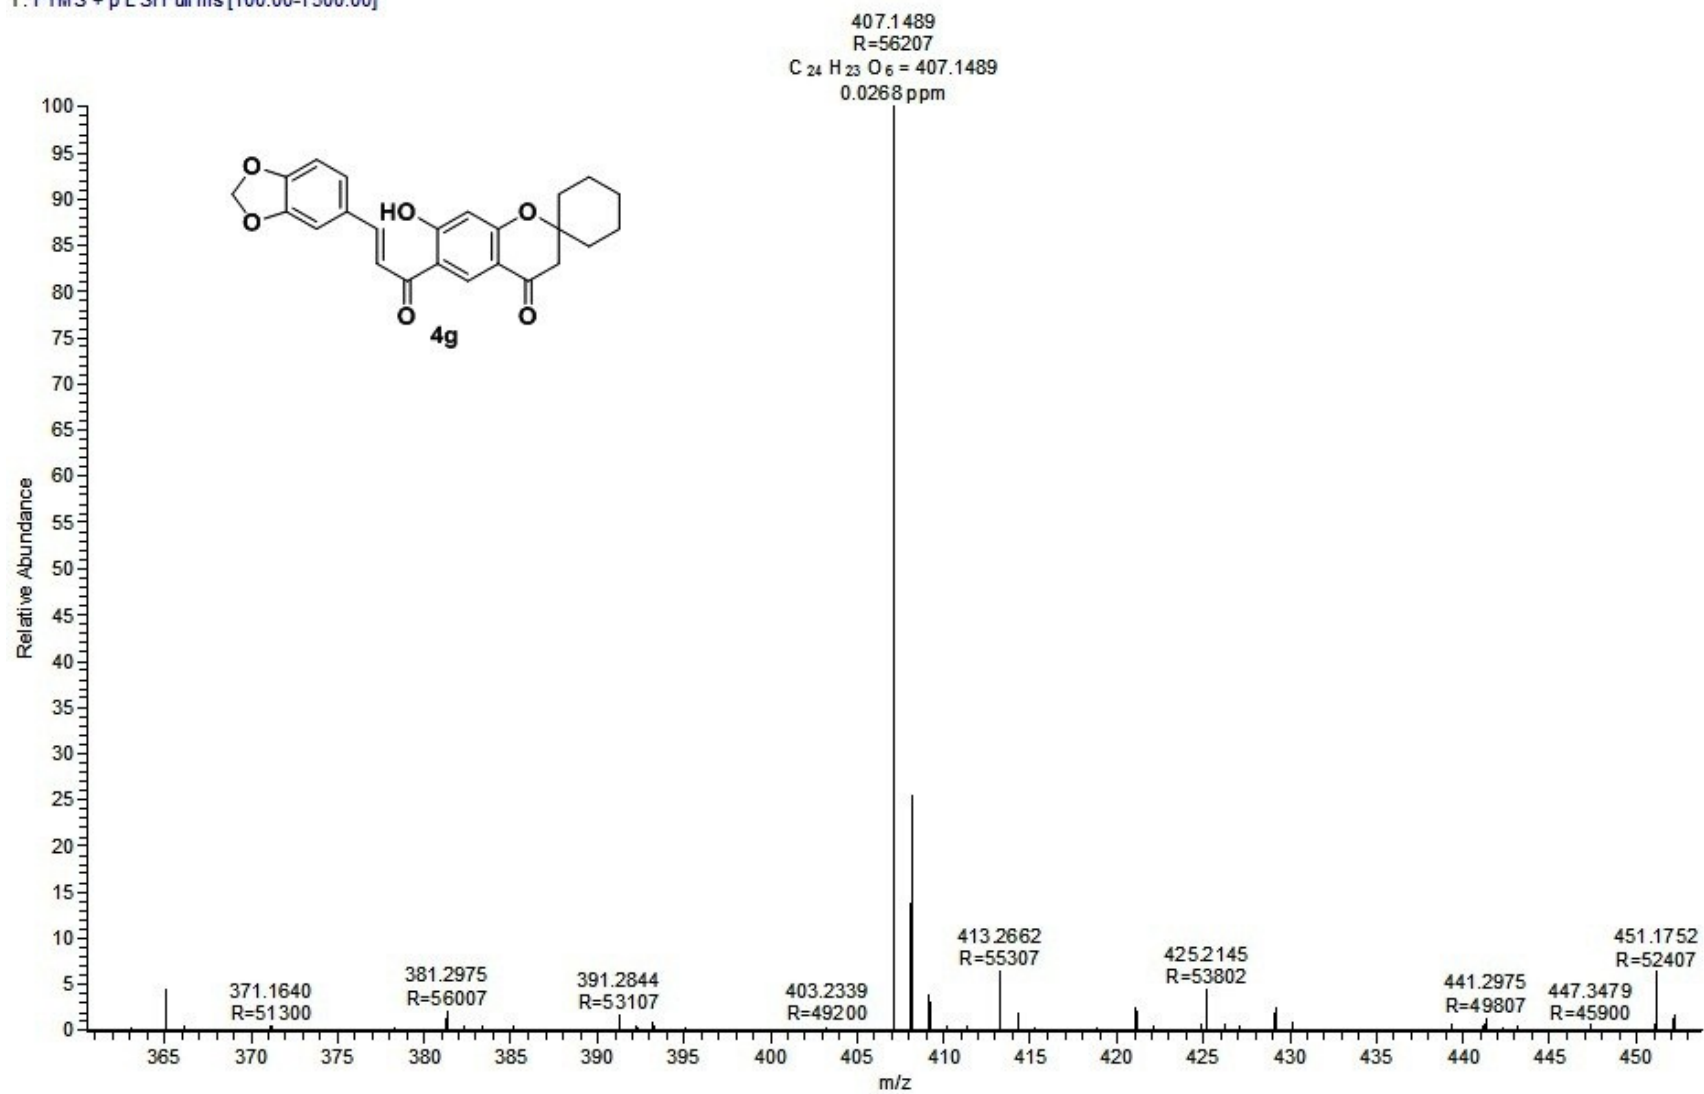

HRMS of Compound 4g

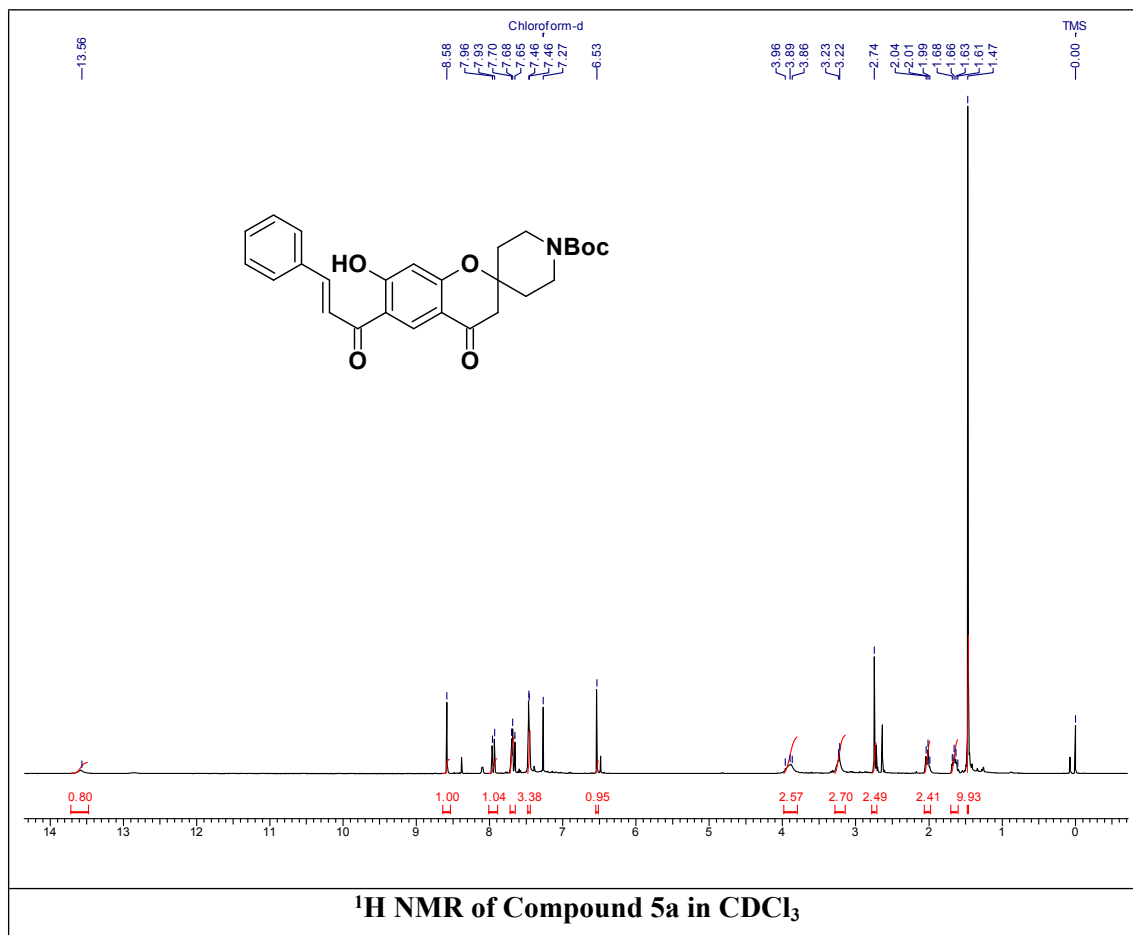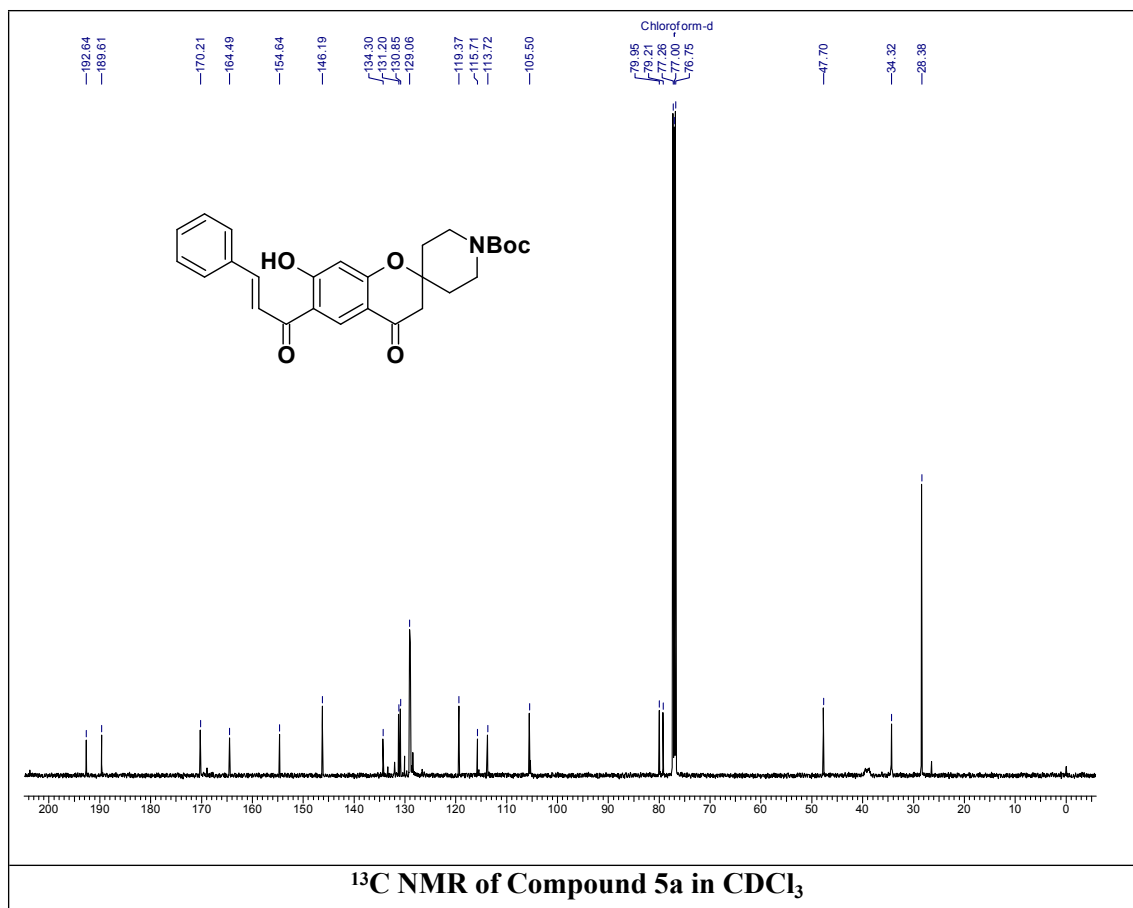



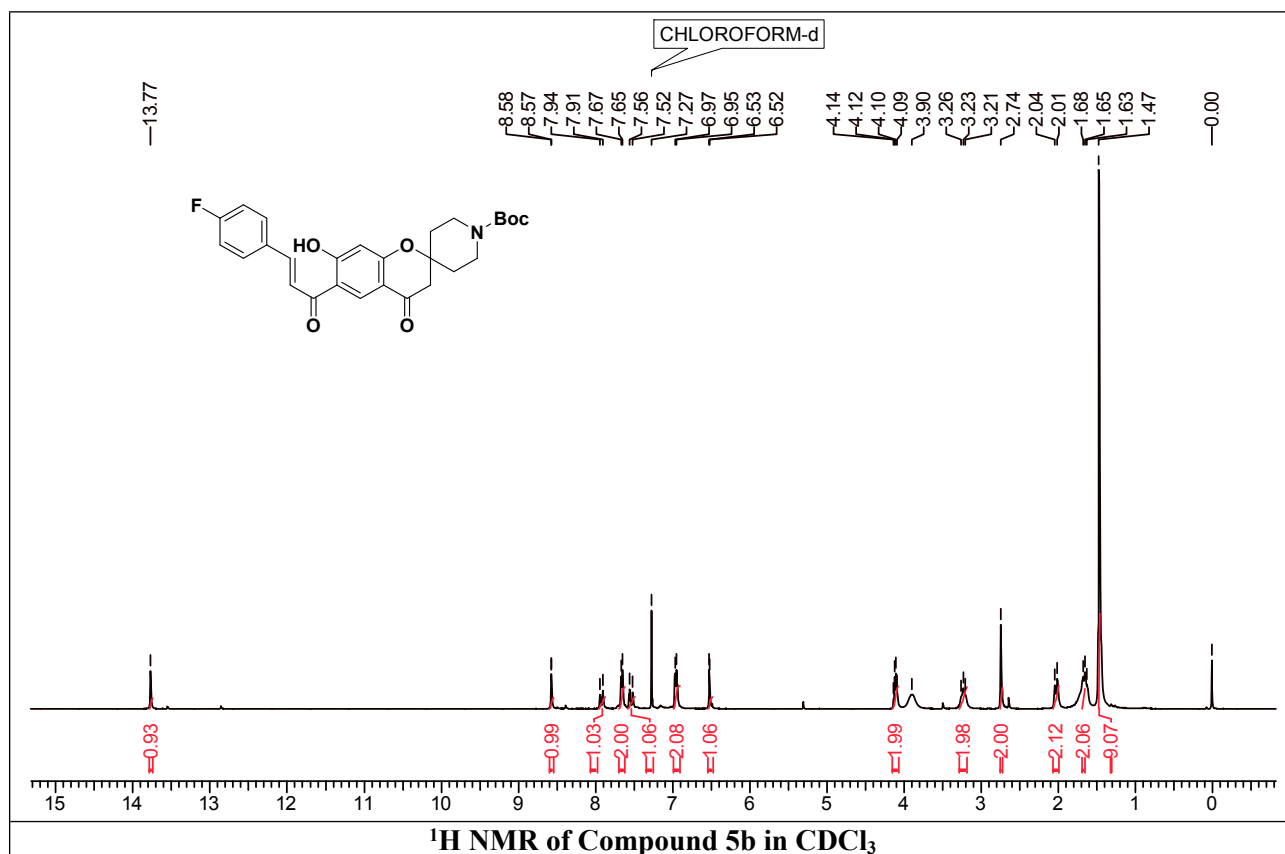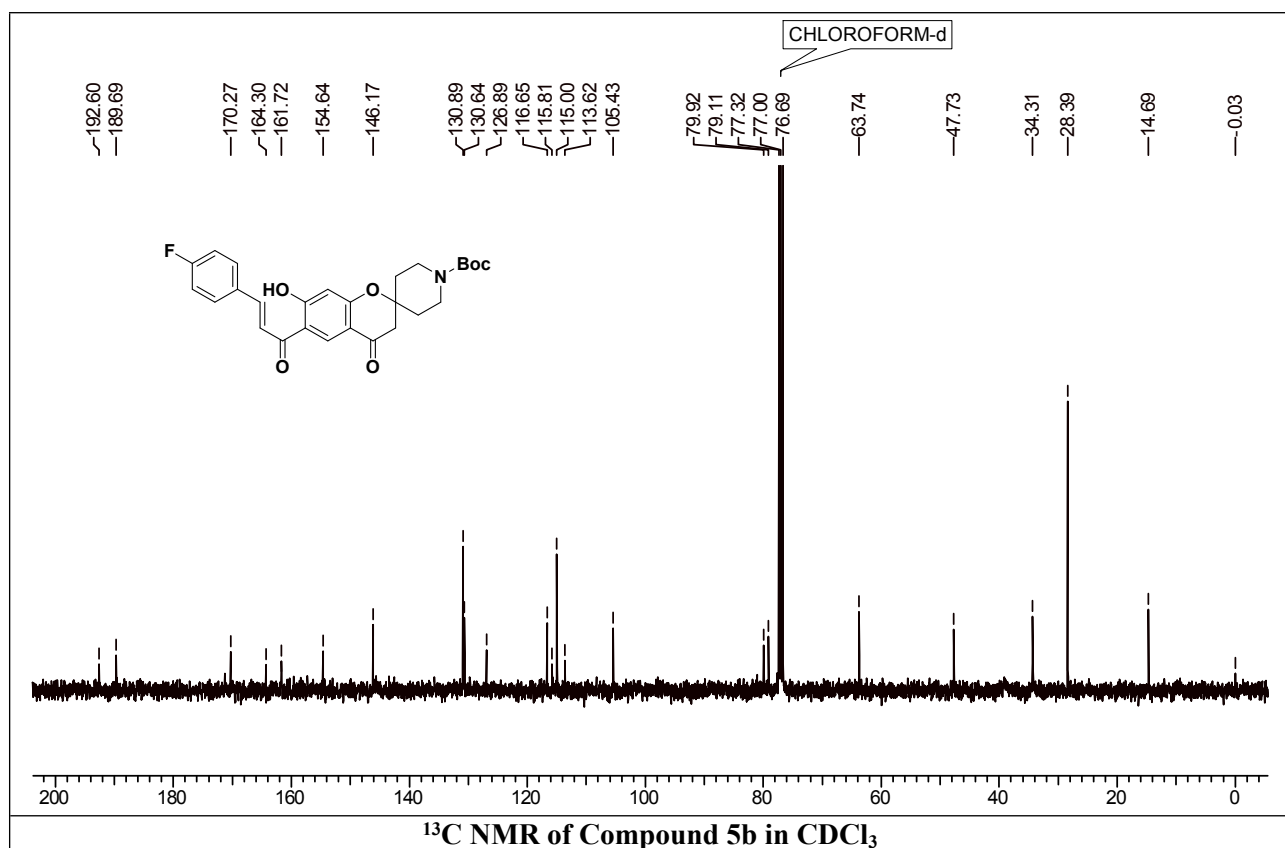

SB-9\_150916125221 #193 RT: 0.86 AV: 1 NL: 6.75E6  
T: FTMS + p ESIFull ms [100.00-1500.00]

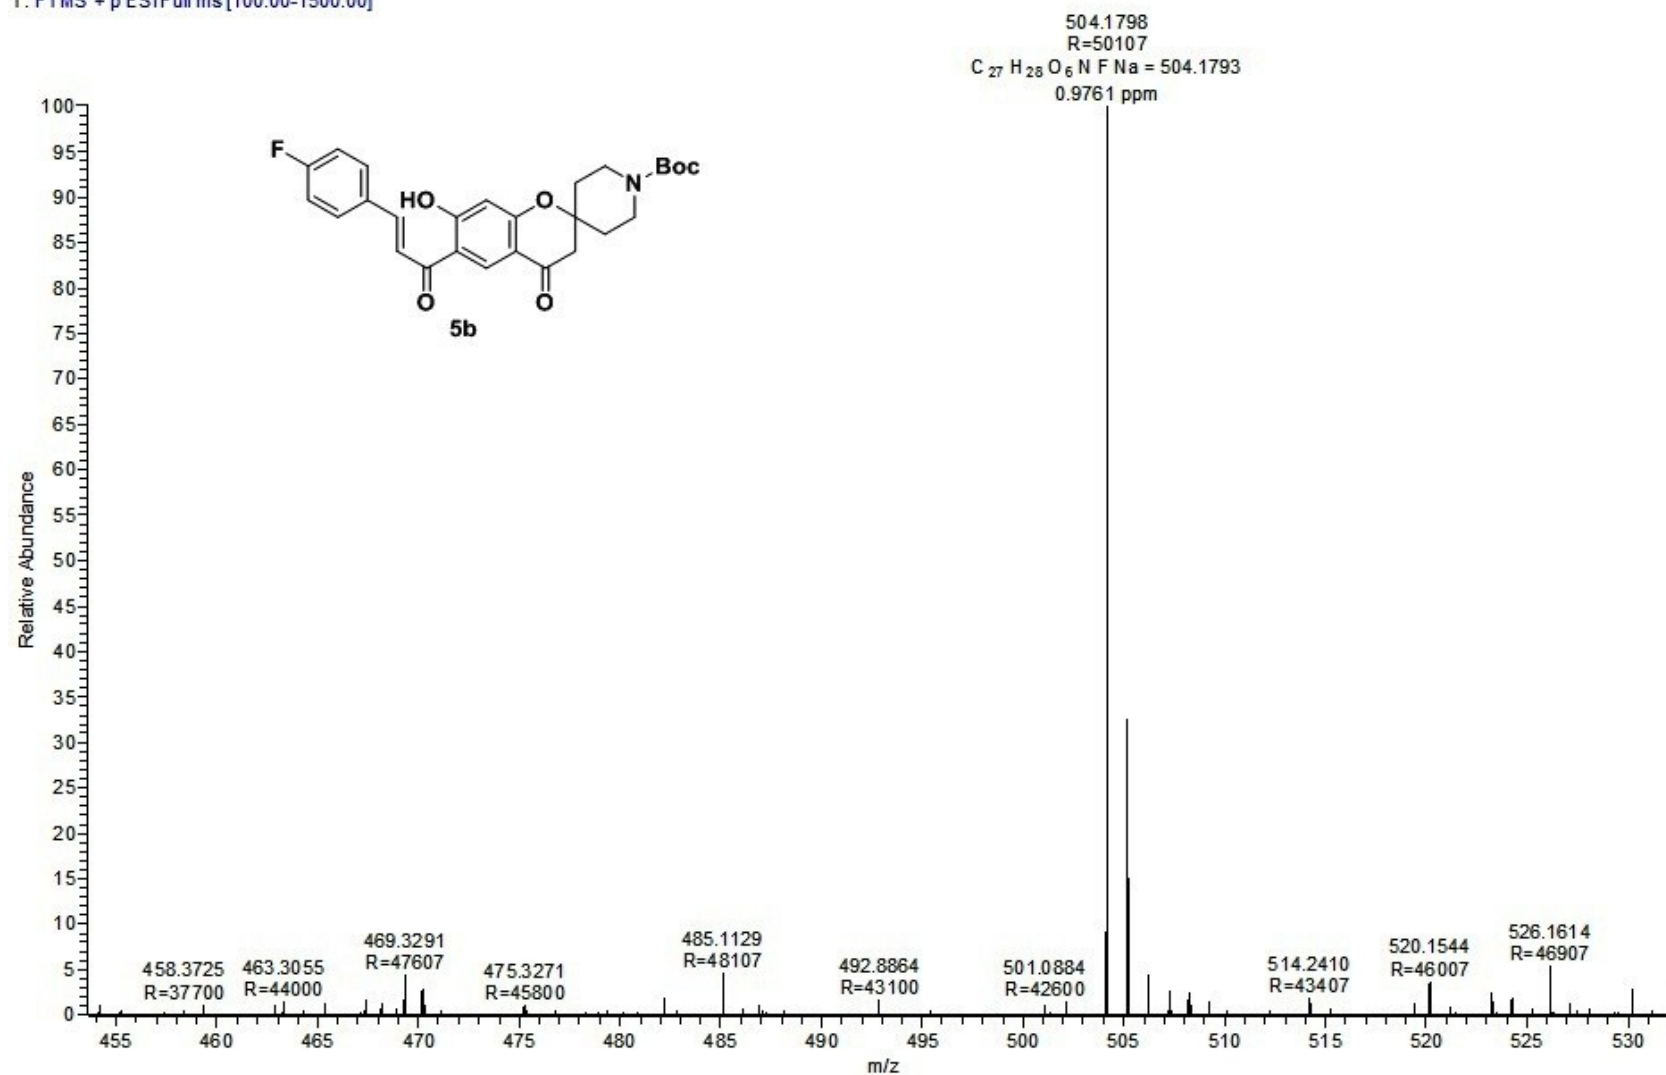

HRMS of Compound 5b

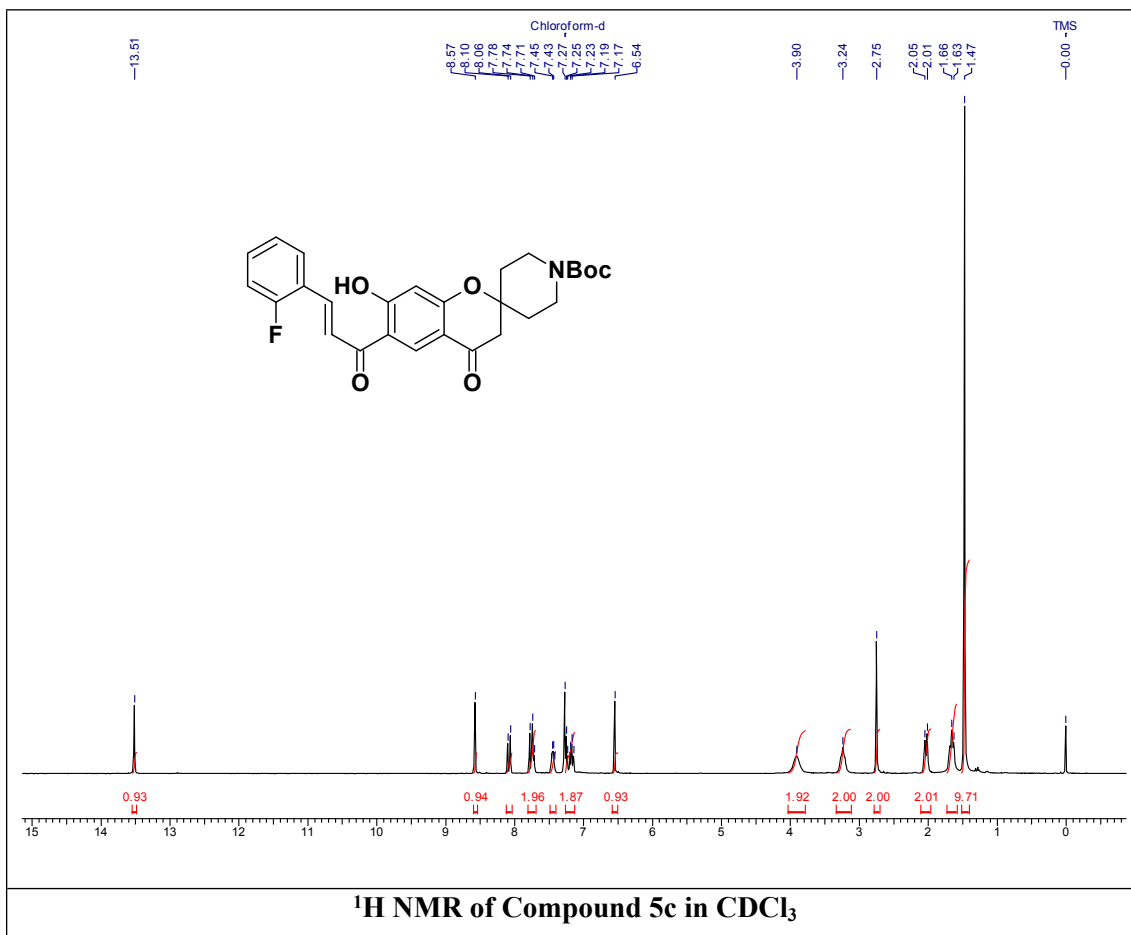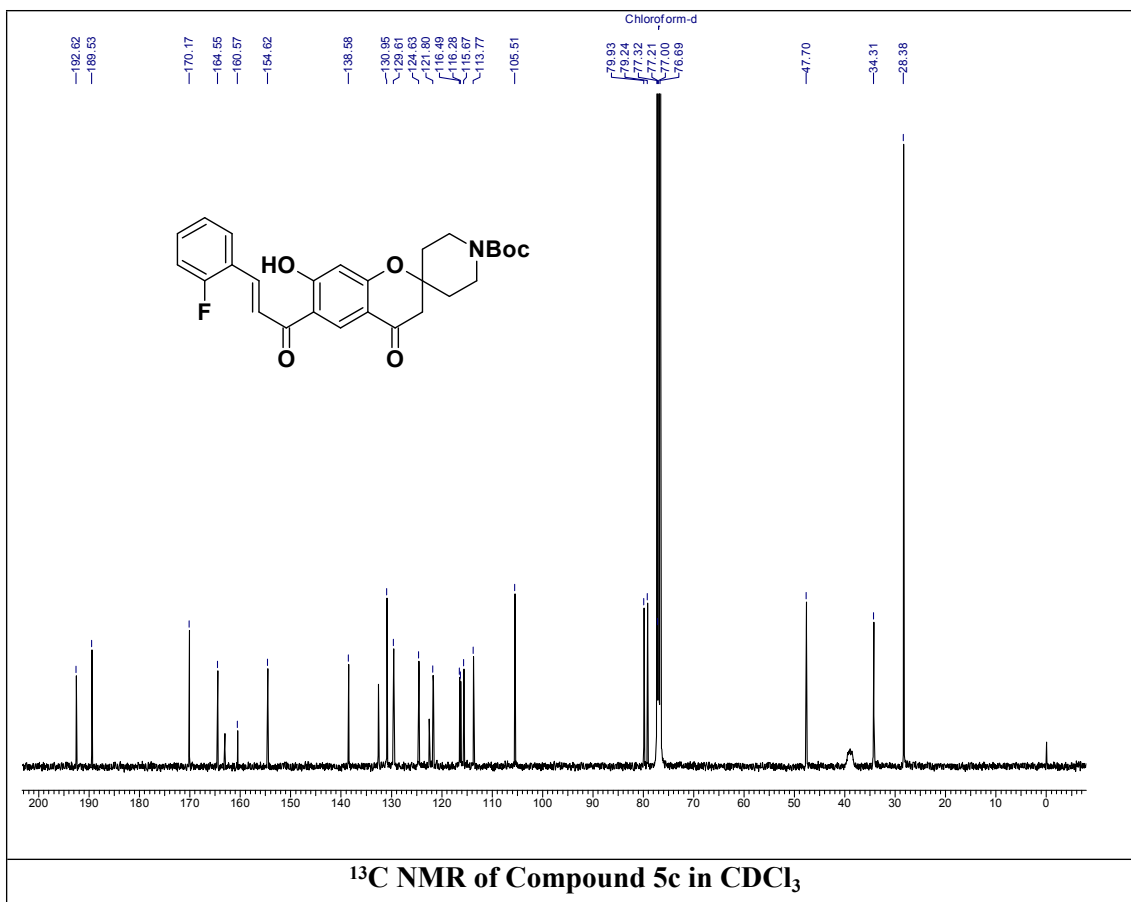



SB-10 150916125532 #225 RT: 1.00 AV: 1 NL: 5.36E7  
T: FTMS + pE SI Full ms [100.00-1500.00]

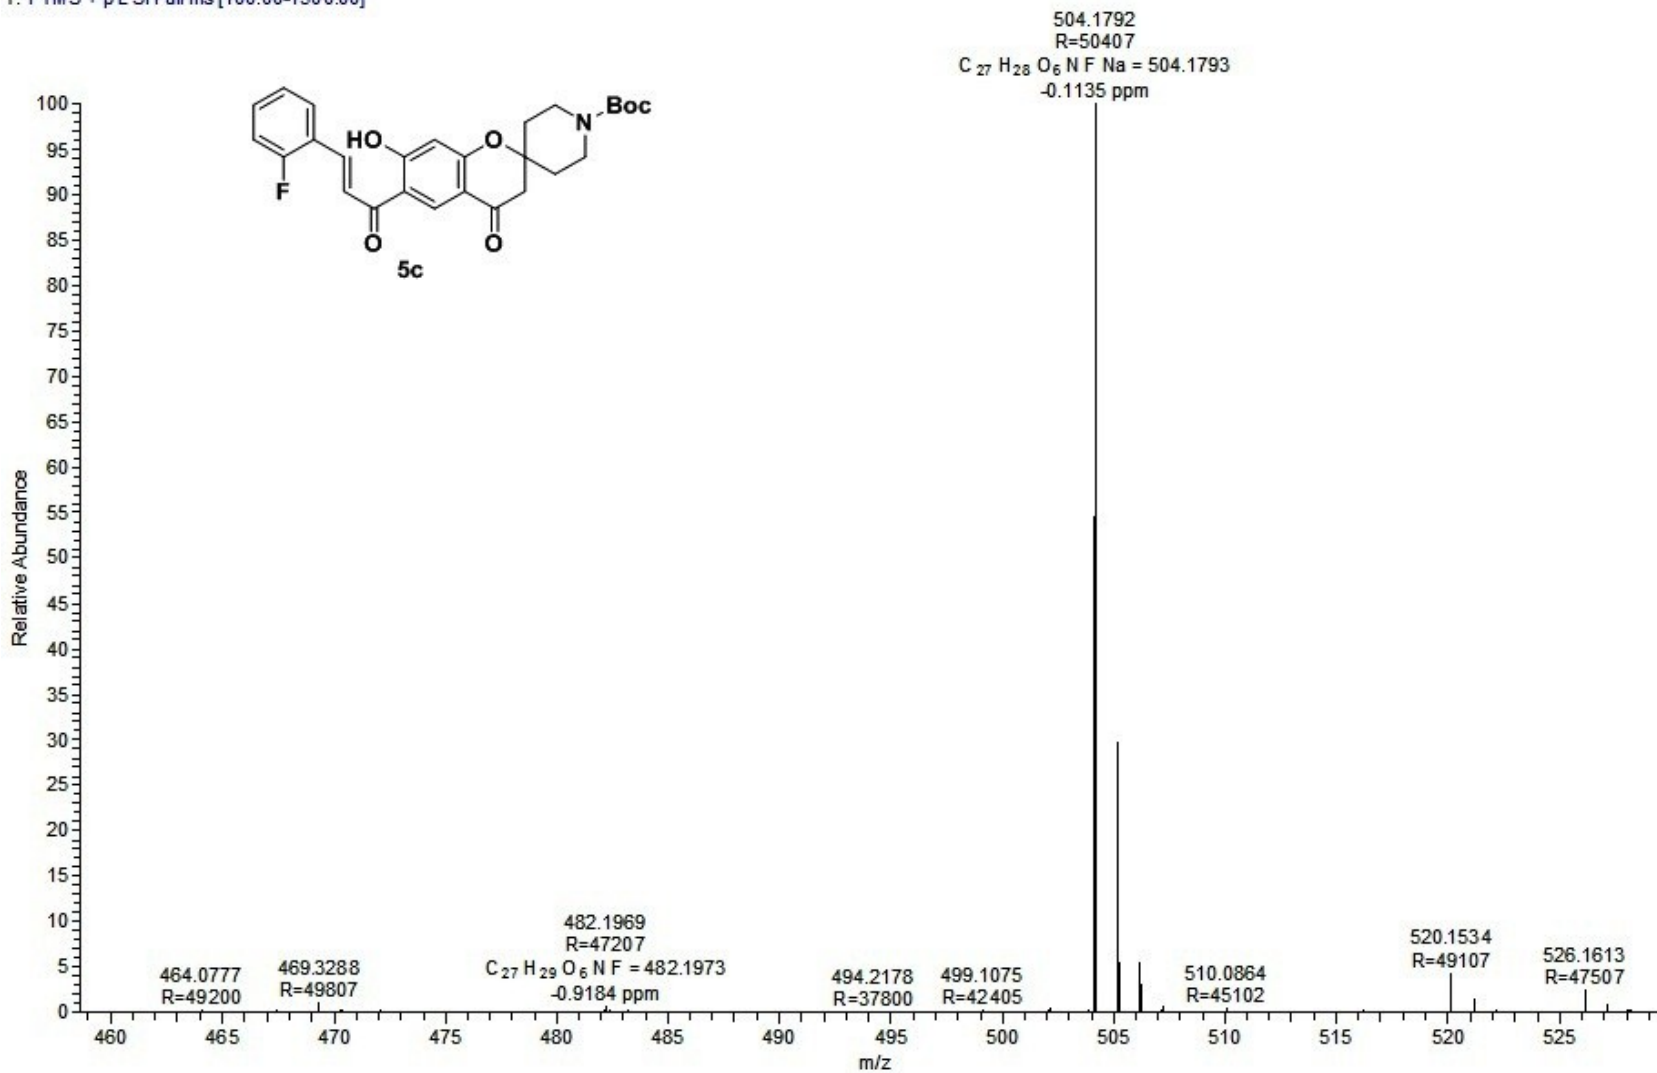

HRMS of Compound 5c



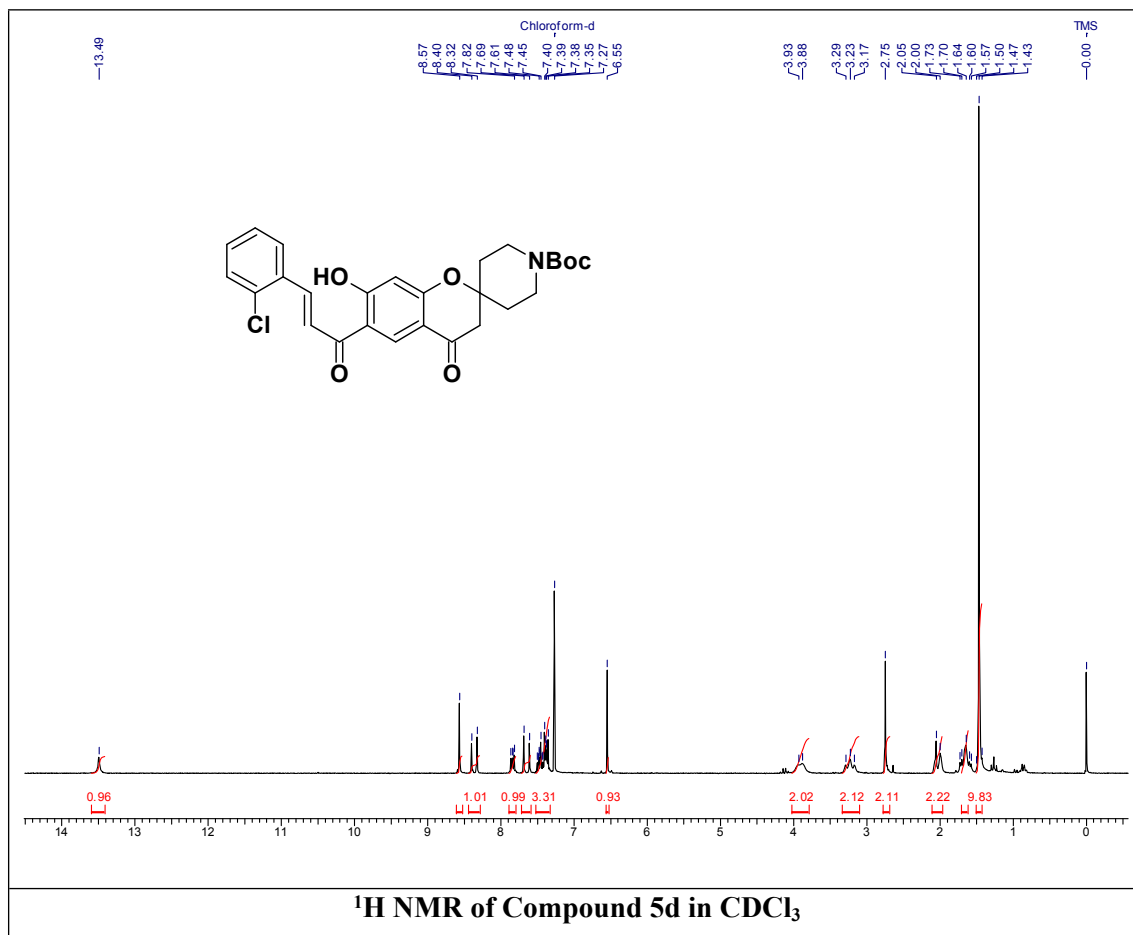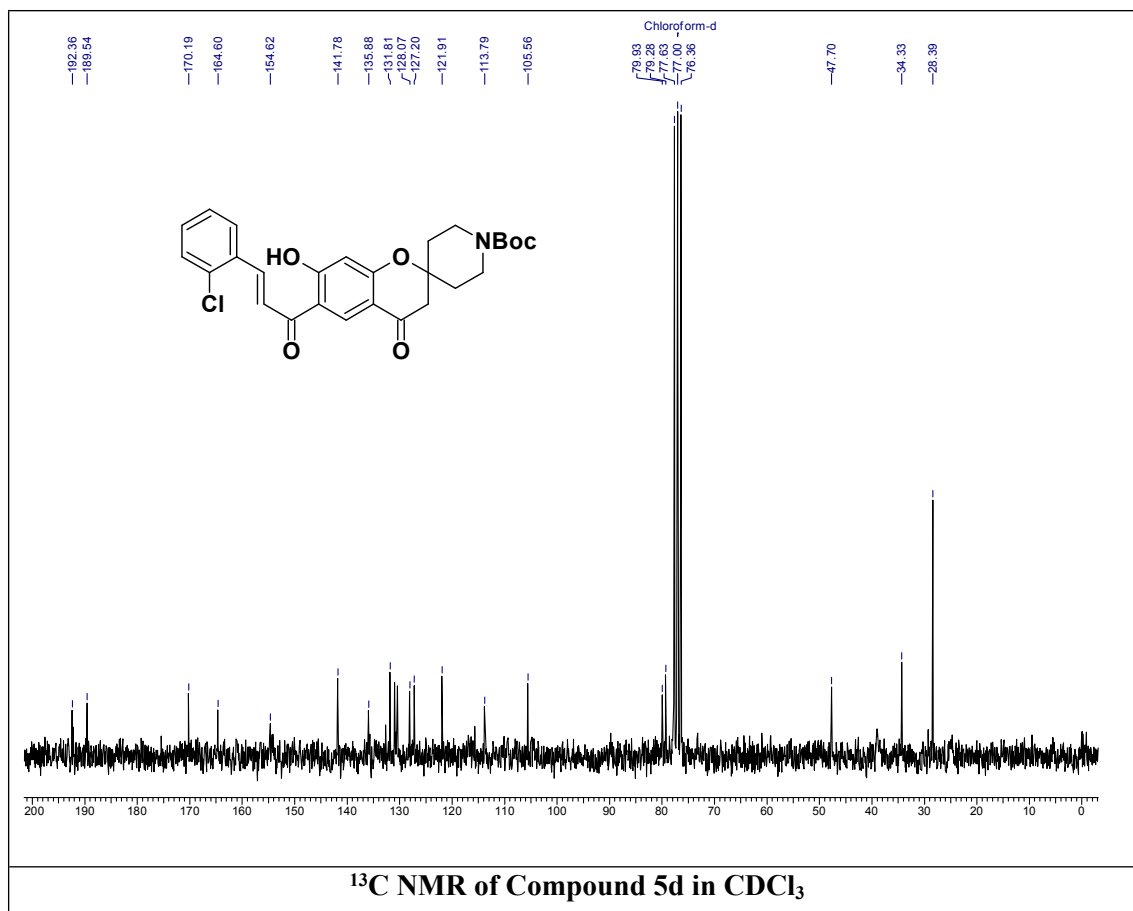

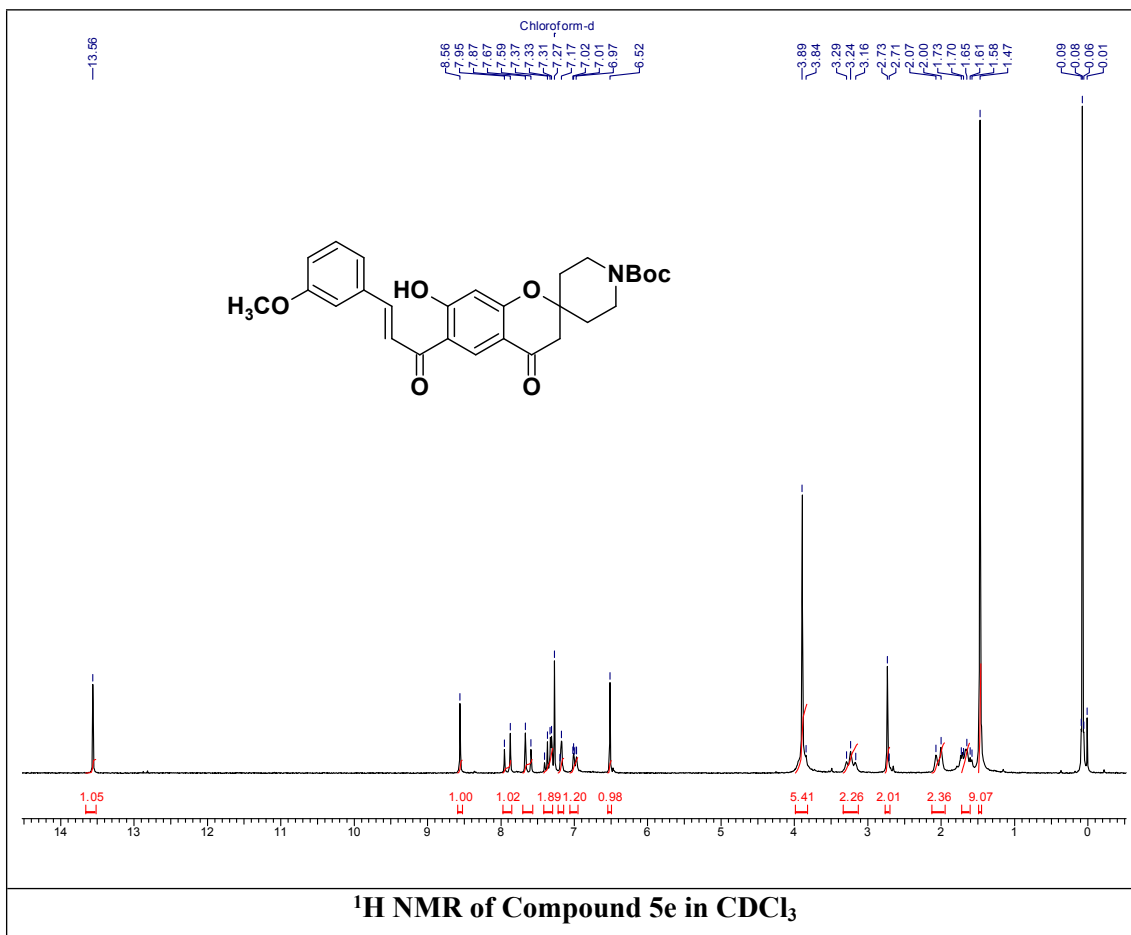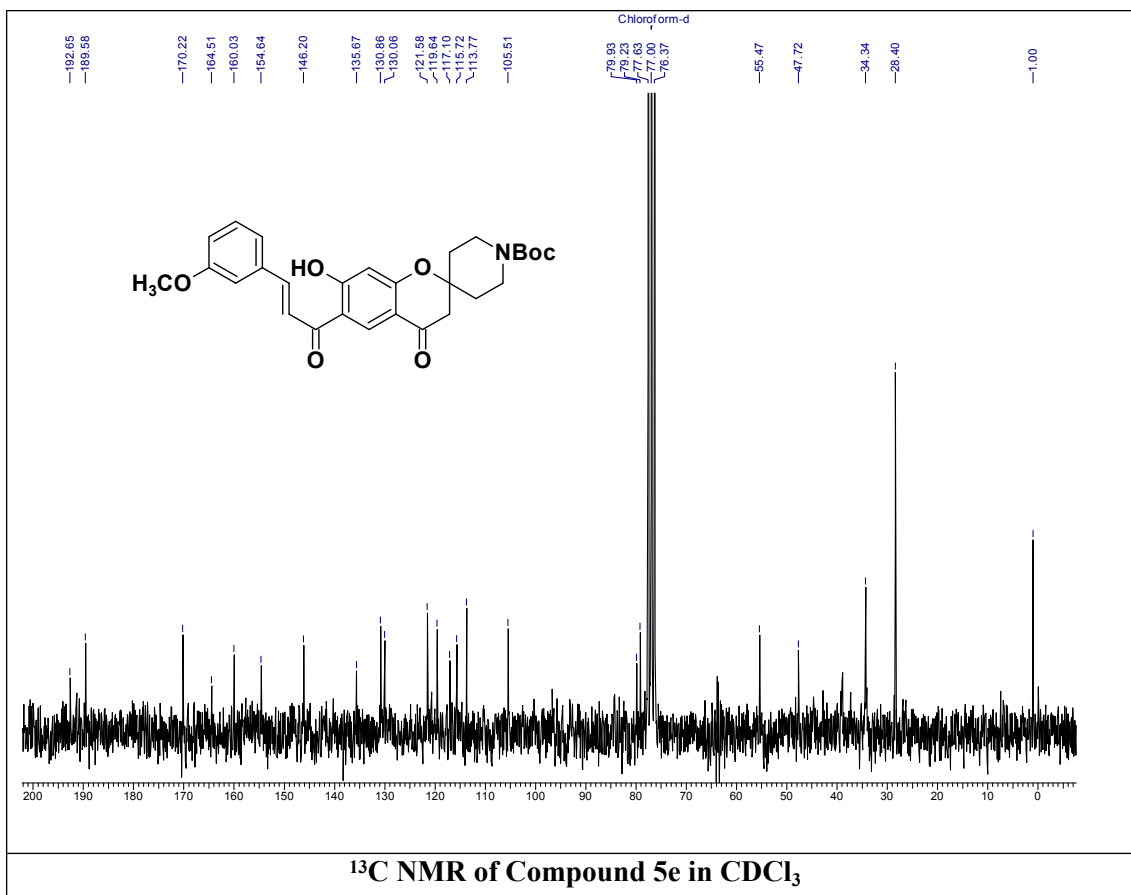



SB-12 150916130149 #128 RT: 0.57 AV: 1 NL: 4.73E6  
T: FTMS + p ESI Full ms [100.00-1500.00]

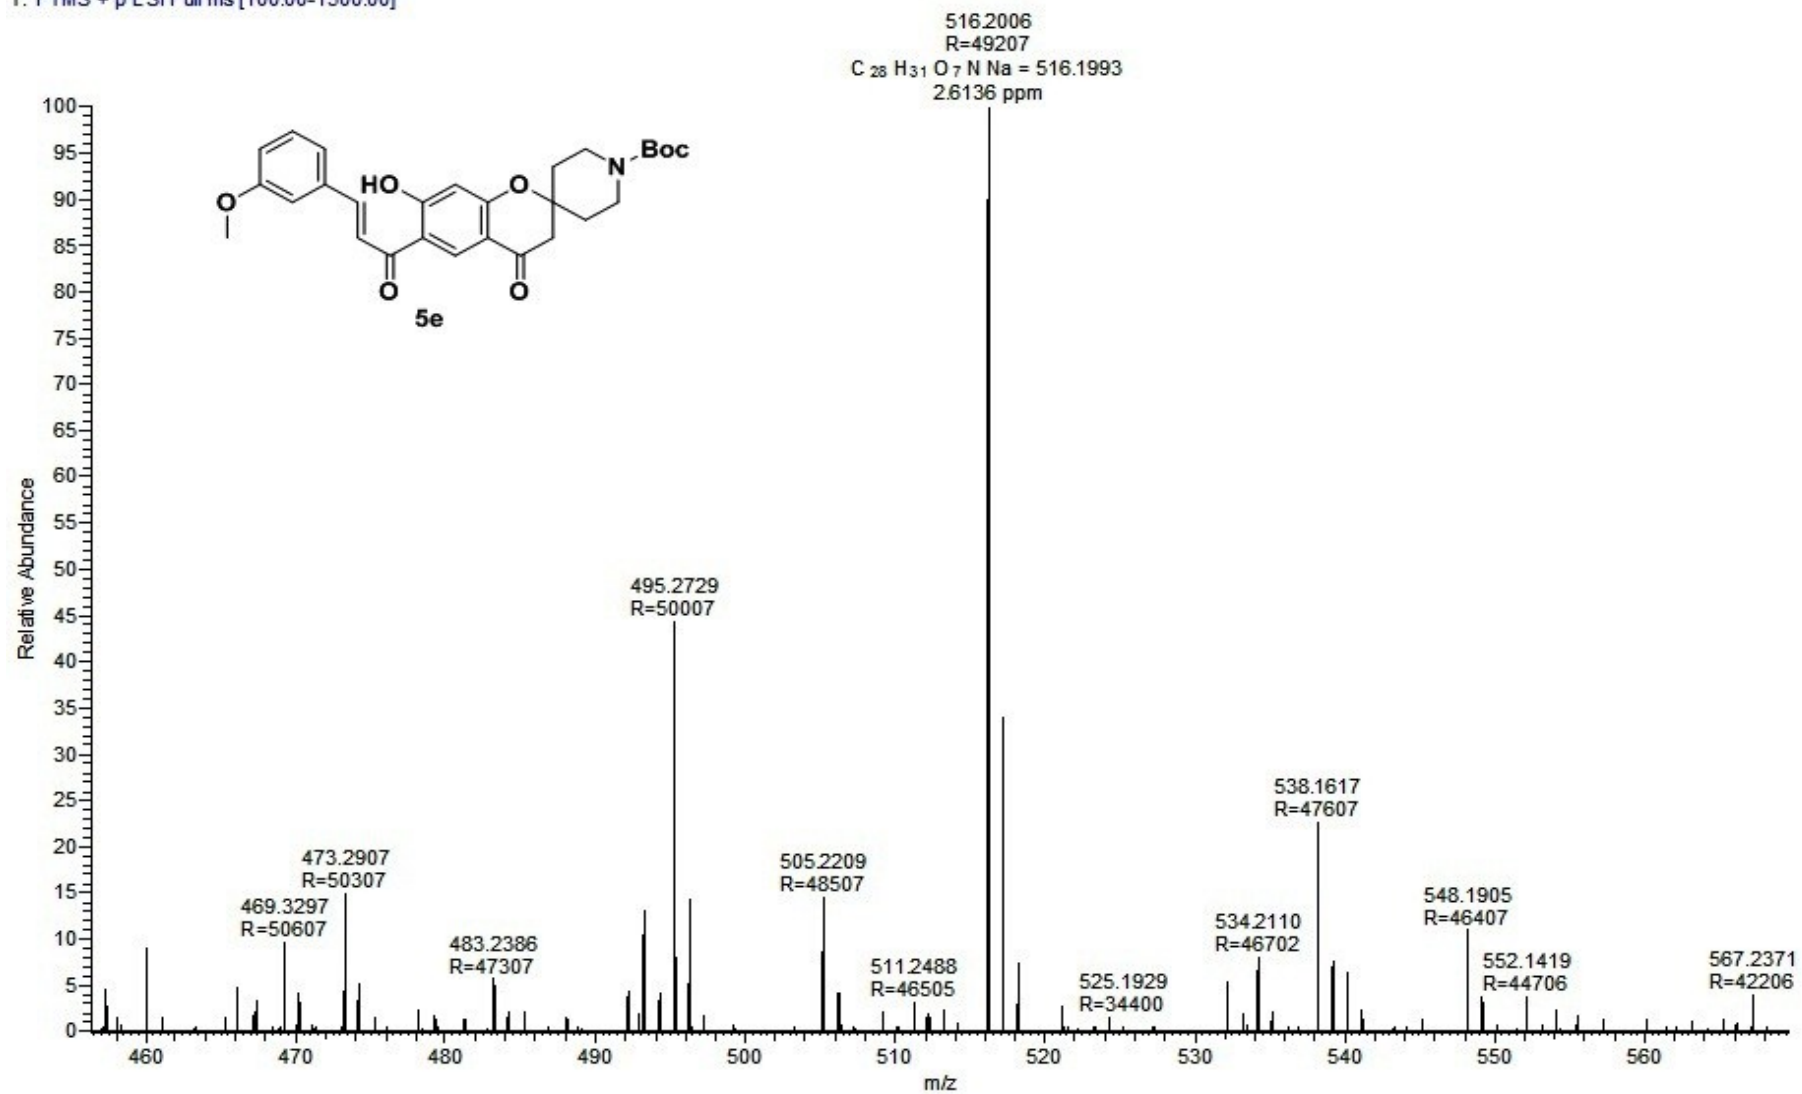

HRMS of Compound 5e

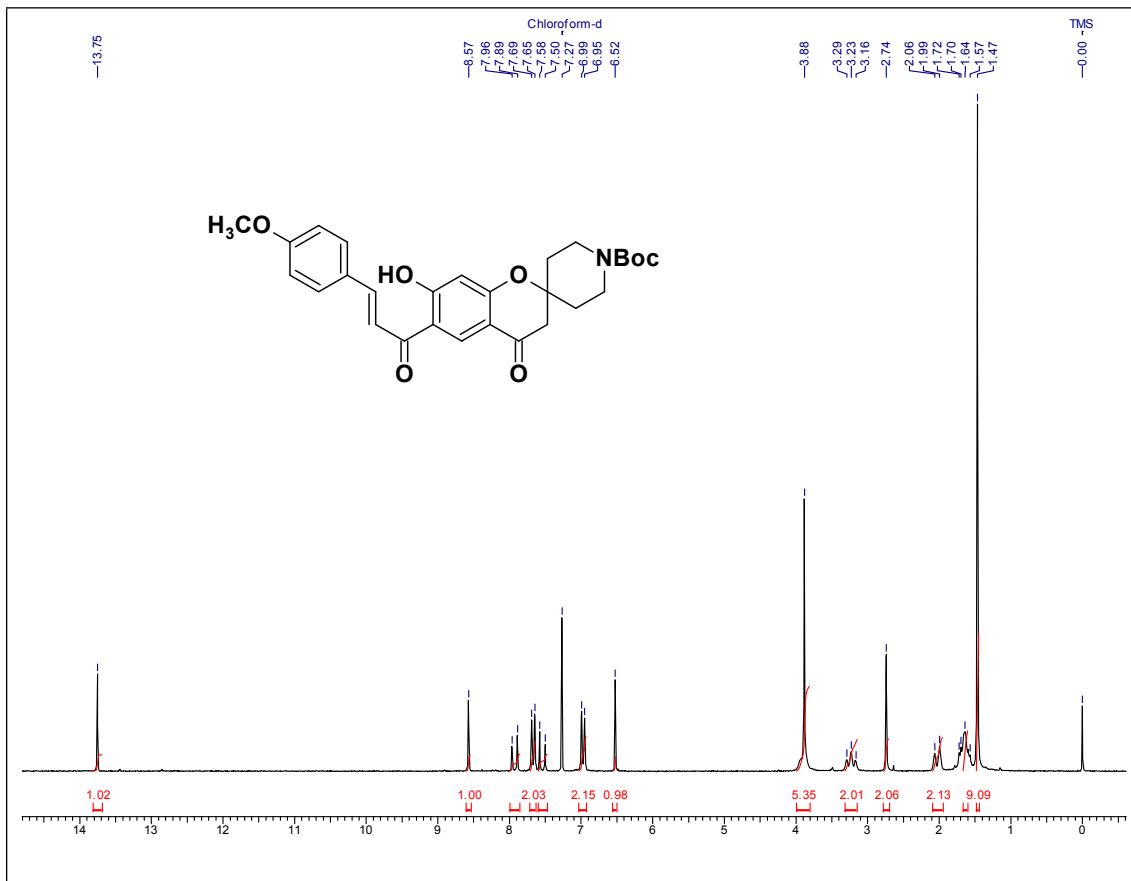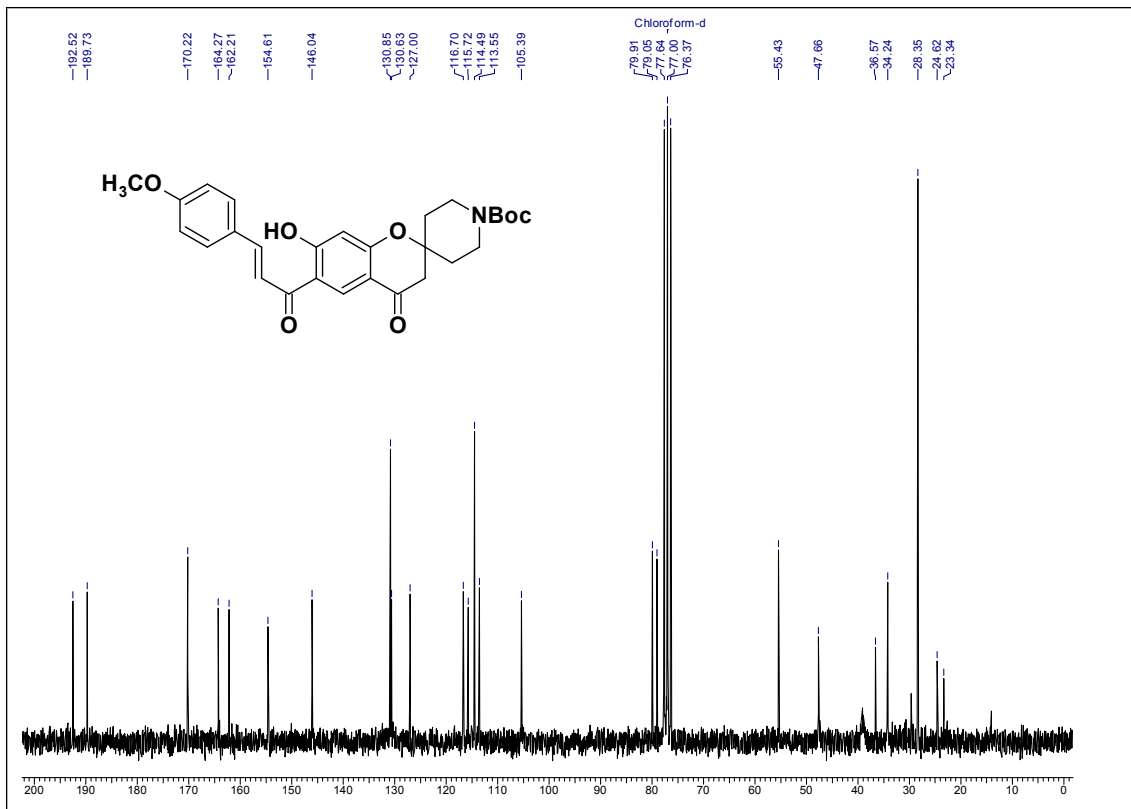



SB-13\_150916130500#208 RT: 0.93 AV: 1 NL: 1.41E8  
T: FTMS + p ESI Full ms [100.00-1500.00]

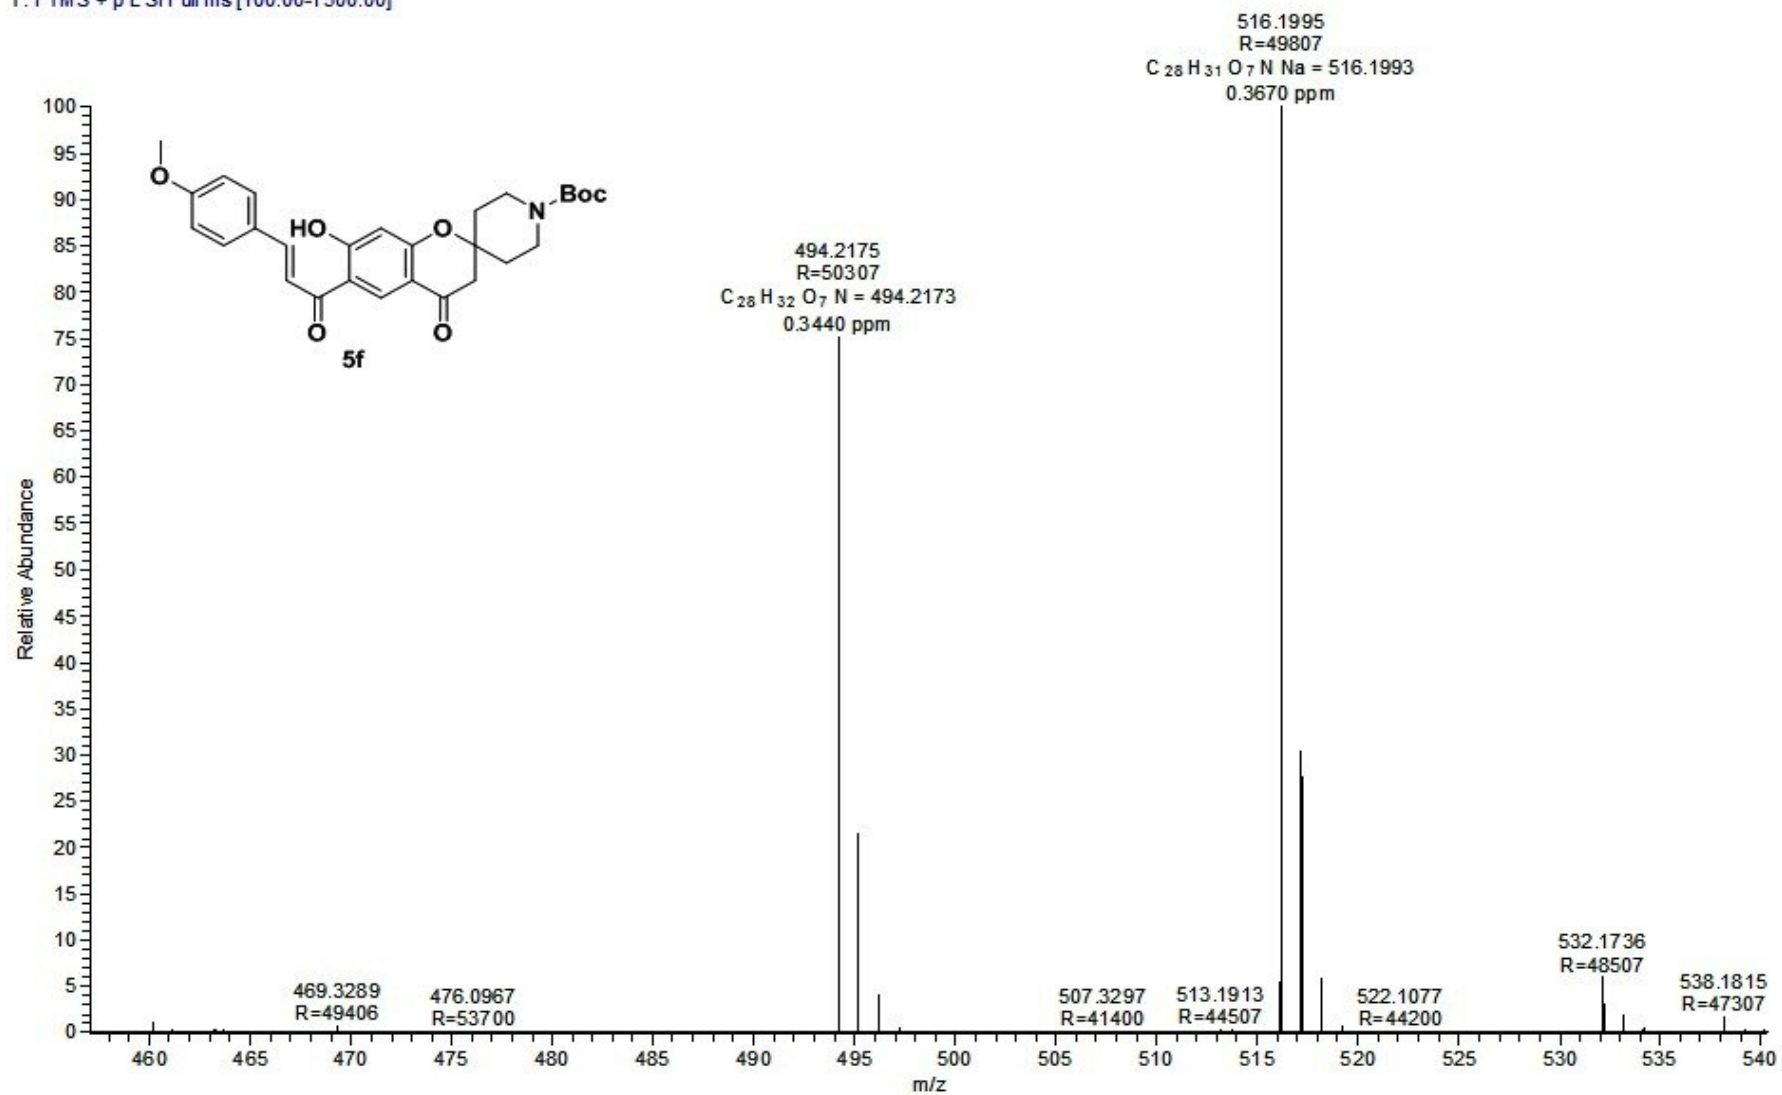

HRMS of Compound 5f

## HPLC purity of Compound 5f

**Conditions:** Grace Smart RP-18 (250 X 4.6 mm) column;  
eluent: MeOH:H<sub>2</sub>O (90:10); flow rate: 1 mL/min; detector  
254 nm.

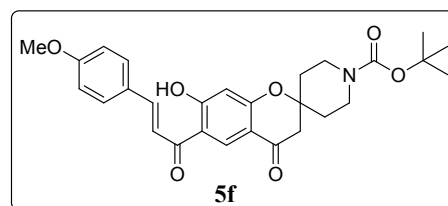

Purity: 95.4 %

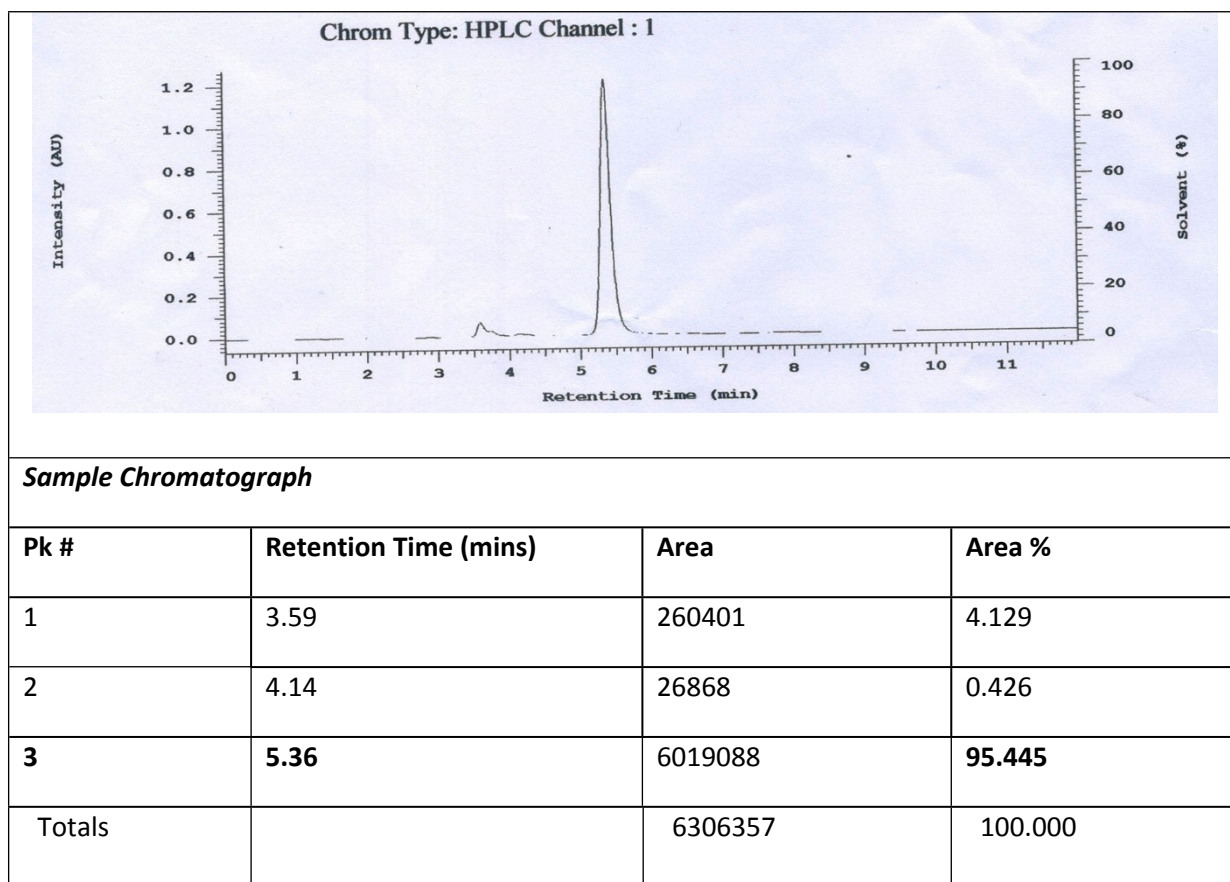



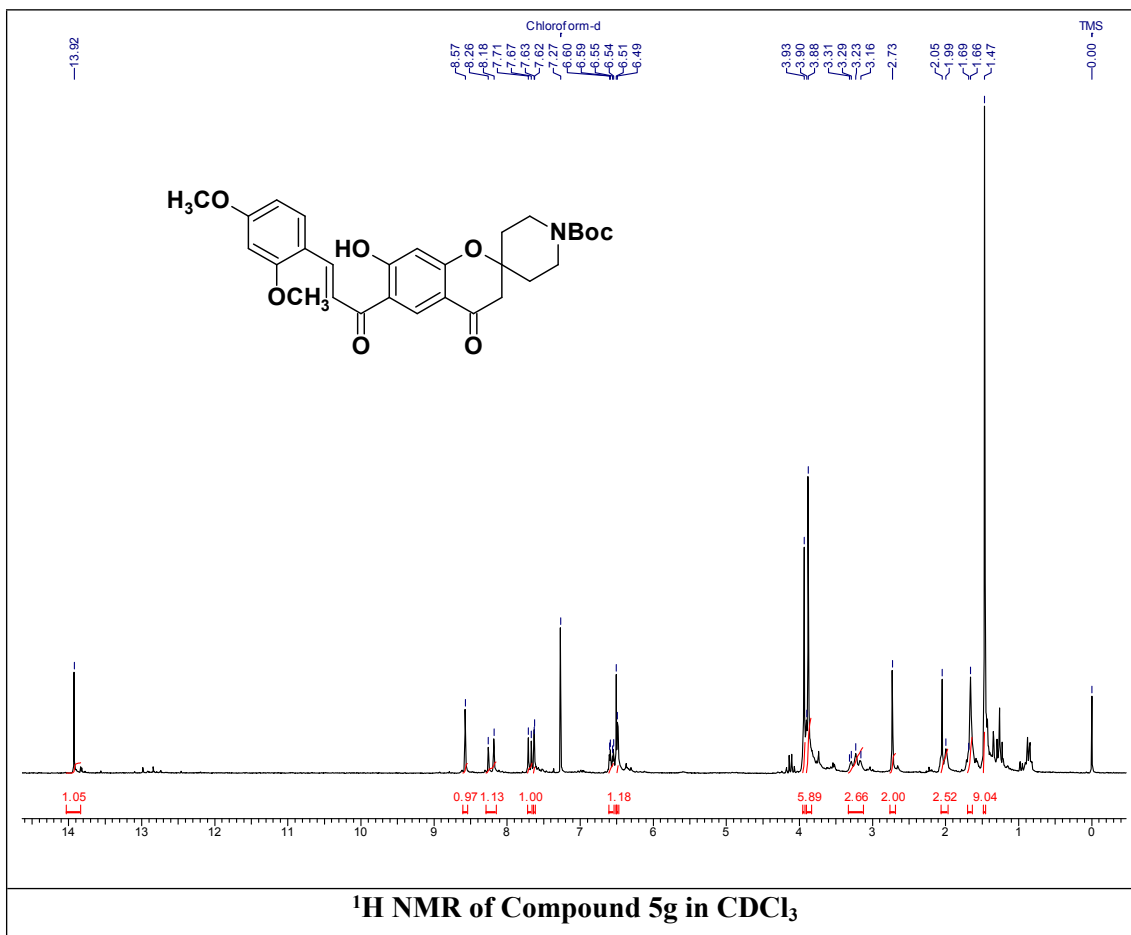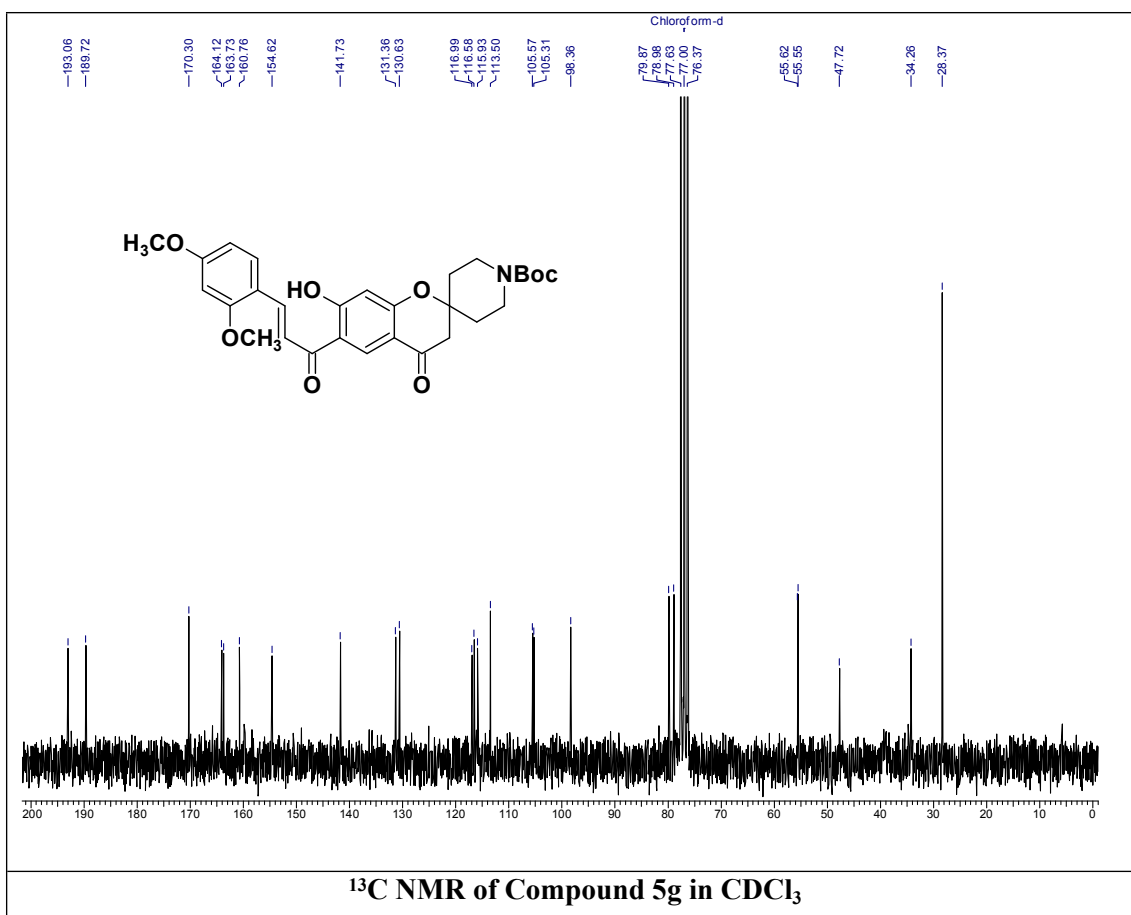

## HPLC purity of Compound 5g

**Conditions:** Grace Smart RP-18 (250 X 4.6 mm) column; eluent: MeOH:H<sub>2</sub>O (90:10); flow rate: 1 mL/min; detector 254 nm.

Purity: 99 %

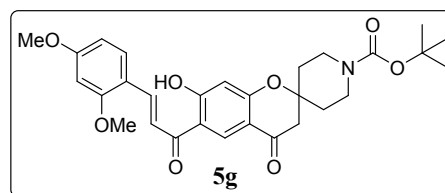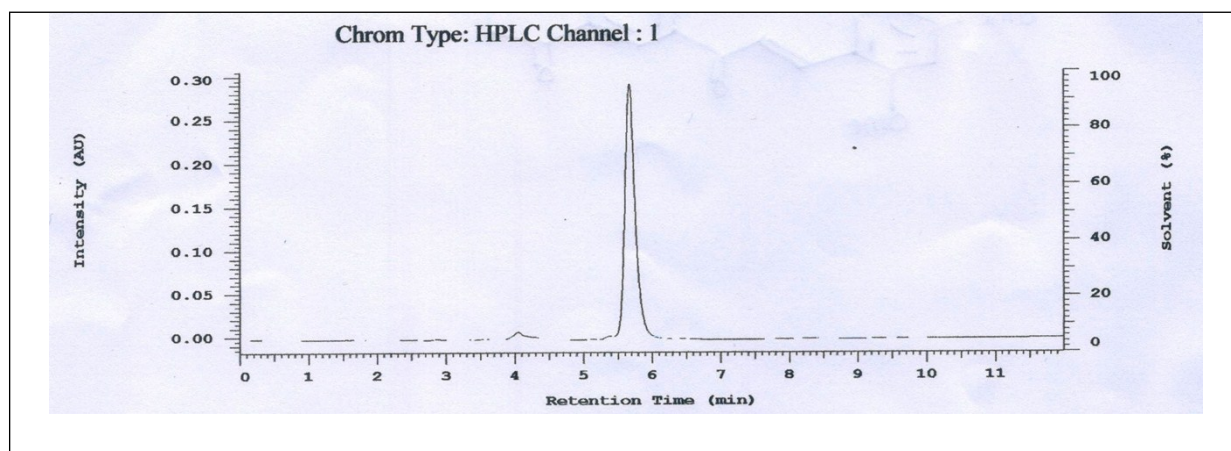

**Sample Chromatograph**

| Pk #   | Retention Time (mins) | Area    | Area %        |
|--------|-----------------------|---------|---------------|
| 1      | 4.05                  | 12909   | 0.844         |
| 2      | <b>5.67</b>           | 1516690 | <b>99.156</b> |
| Totals |                       | 1529599 | 100.000       |

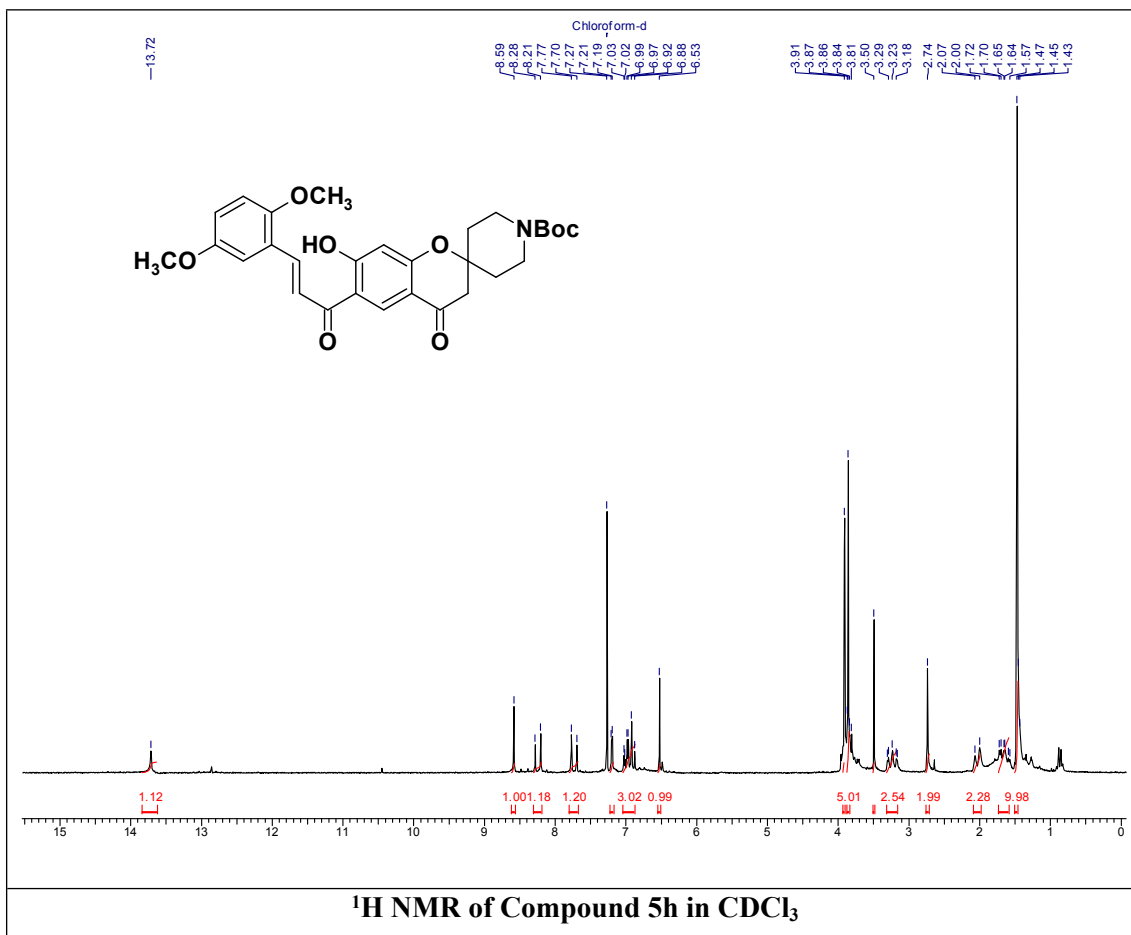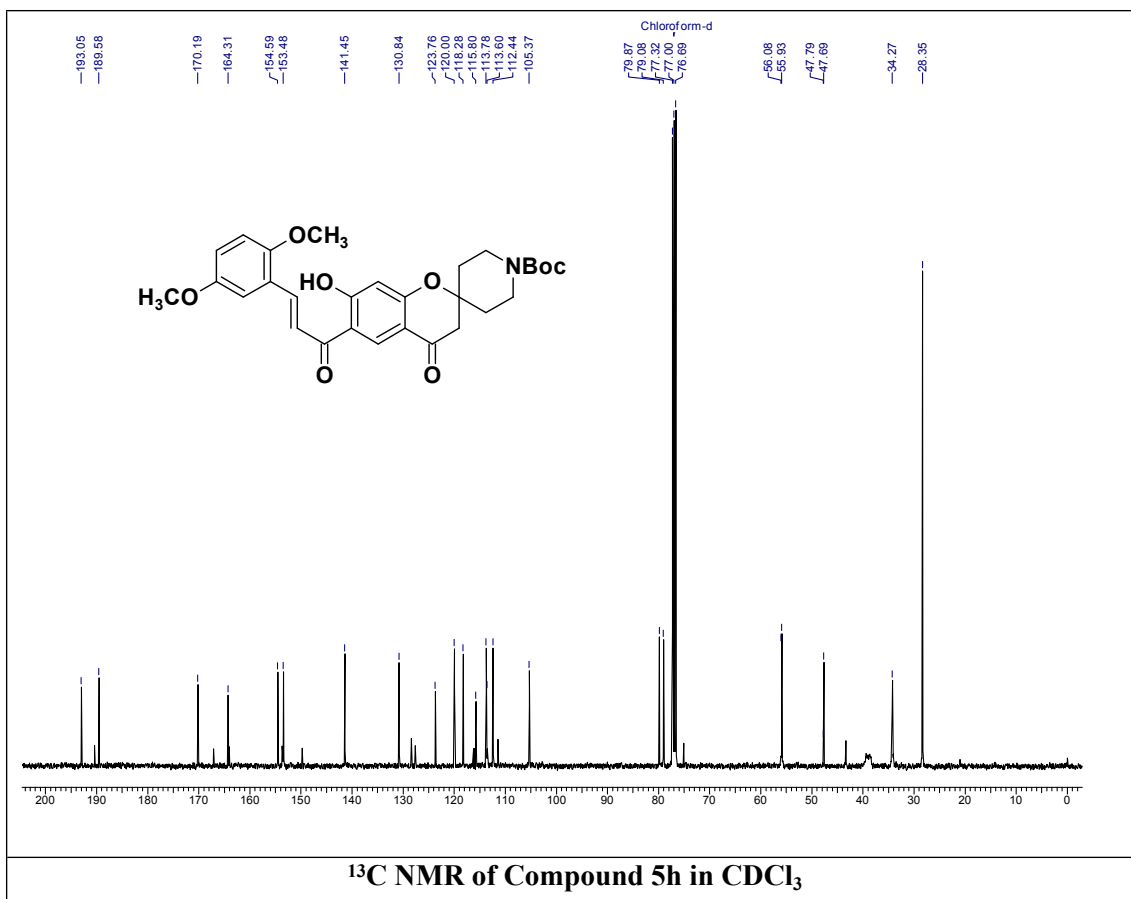



## SAR studies

Table S1: Electronic descriptors employed for correlation studies in GP.

| Entry | AM1_HOMO   | AM1_LUMO    | PM3_HOMO   | PM3_LUMO    | MNDO_HOMO  | MNDO_LUMO   |
|-------|------------|-------------|------------|-------------|------------|-------------|
| 1     | -9.4004498 | -1.09475    | -9.4795599 | -1.17154    | -9.3516397 | -0.78029001 |
| 2     | -9.3777103 | -0.89129001 | -9.3791599 | -0.99450999 | -9.3366003 | -0.71710998 |
| 3     | -9.4397097 | -0.80559999 | -9.4141598 | -0.87725002 | -9.3687696 | -0.70893002 |
| 4     | -8.7639599 | -0.64767998 | -8.88239   | -0.64622998 | -9.2380104 | -0.65597999 |
| 5     | -8.8987398 | -0.70765001 | -9.14433   | -0.52806997 | -8.9541798 | -0.57546997 |
| 6     | -9.0514898 | -0.67987001 | -9.1579905 | -0.67756999 | -9.2597103 | -0.62260002 |
| 7     | -8.8529701 | -0.75334001 | -8.97649   | -0.69361001 | -8.94069   | -0.67491001 |
| 8     | -9.4781399 | -0.95204997 | -9.5657597 | -0.89903003 | -9.3961897 | -0.69998002 |
| 9     | -9.4634399 | -1.1199     | -9.6143198 | -1.14518    | -9.4680996 | -0.76512998 |
| 10    | -9.5252399 | -1.10922    | -9.5693703 | -1.1987799  | -9.4319201 | -0.73268002 |
| 11    | -9.5628004 | -1.03737    | -9.5262804 | -0.99789    | -9.4316301 | -0.73553997 |
| 12    | -9.0907297 | -0.74800003 | -9.18186   | -0.68338001 | -9.21418   | -0.69173998 |
| 13    | -8.7935896 | -0.73268998 | -8.94485   | -0.68347001 | -9.2528095 | -0.73294997 |
| 14    | -8.9224596 | -0.78347999 | -9.1386299 | -0.61229002 | -8.9632902 | -0.67711002 |
| 15    | -8.84021   | -0.78132999 | -8.96099   | -0.74167001 | -9.1269398 | -0.70254999 |

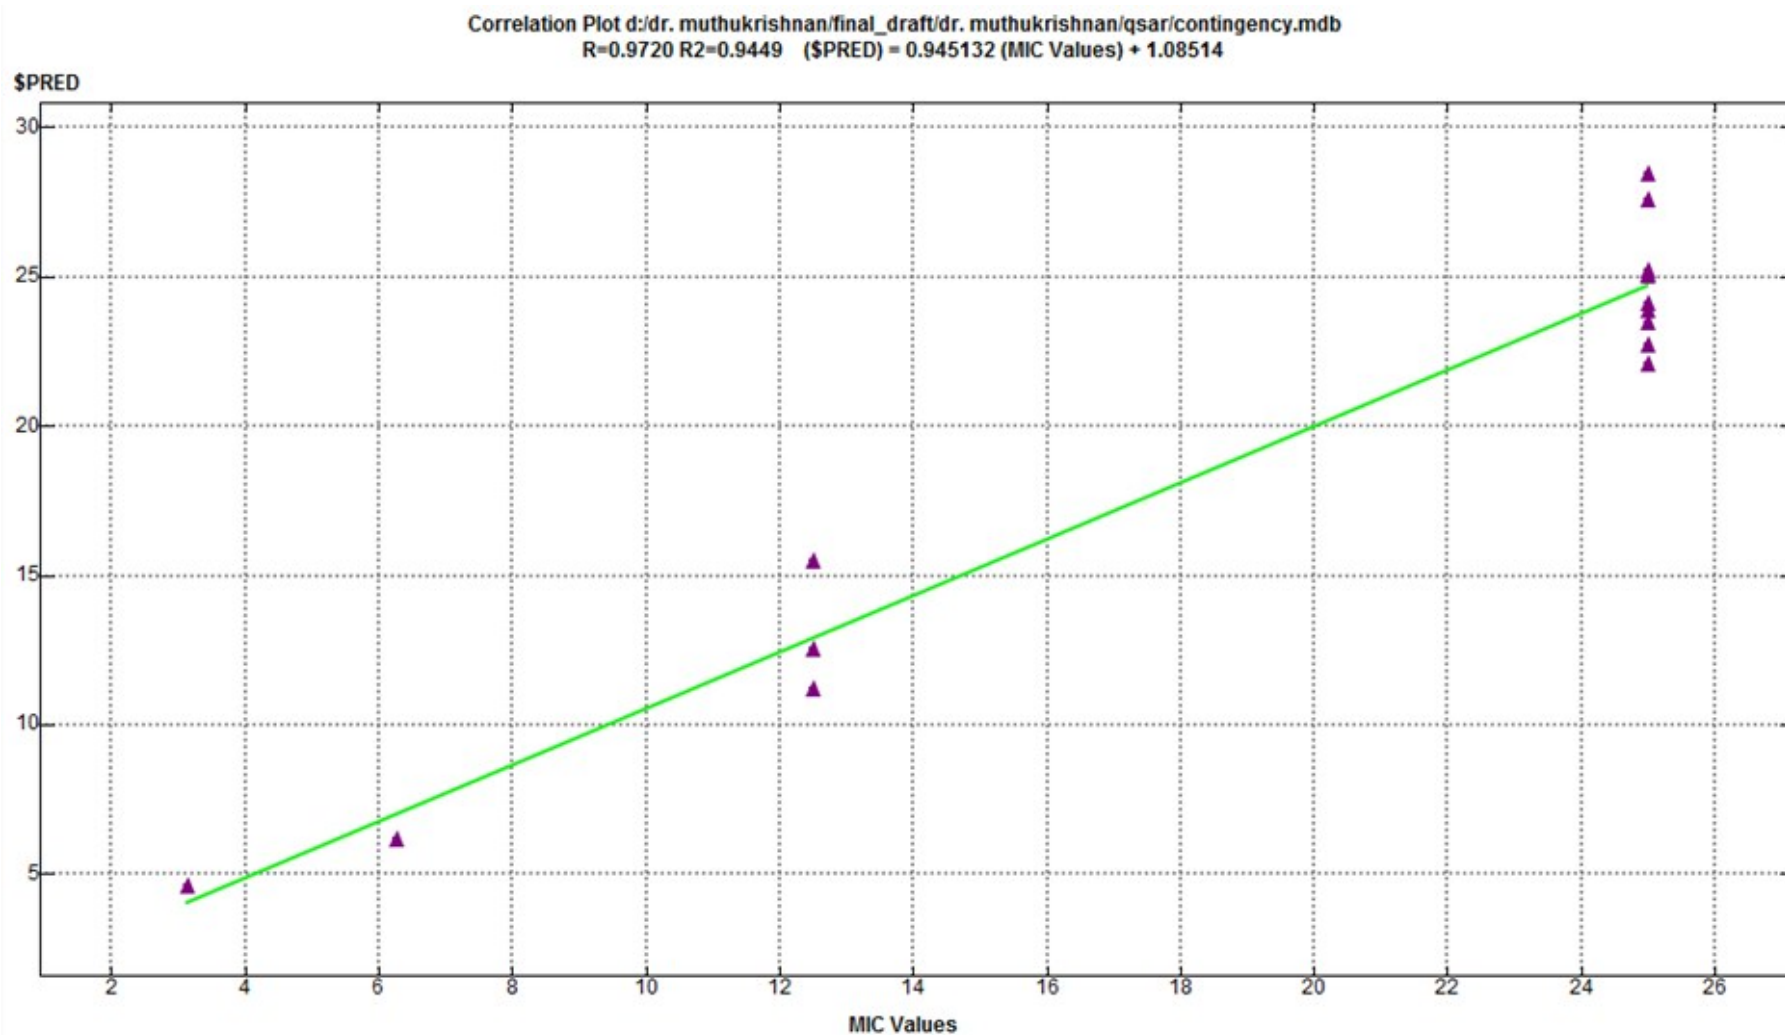

Figure-S1: Correlation plot of 2D Electronic Descriptor QSAR Predicted Data with Experimental MIC Values

Correlation Plot d:/dr. muthukrishnan/final\_draft/dr. muthukrishnan/qsar/mtbfinal.mdb  
R=0.9355 R<sup>2</sup>=0.8751 (\$PRED) = 0.875069 (MIC values(ug/mL)) + 2.47264

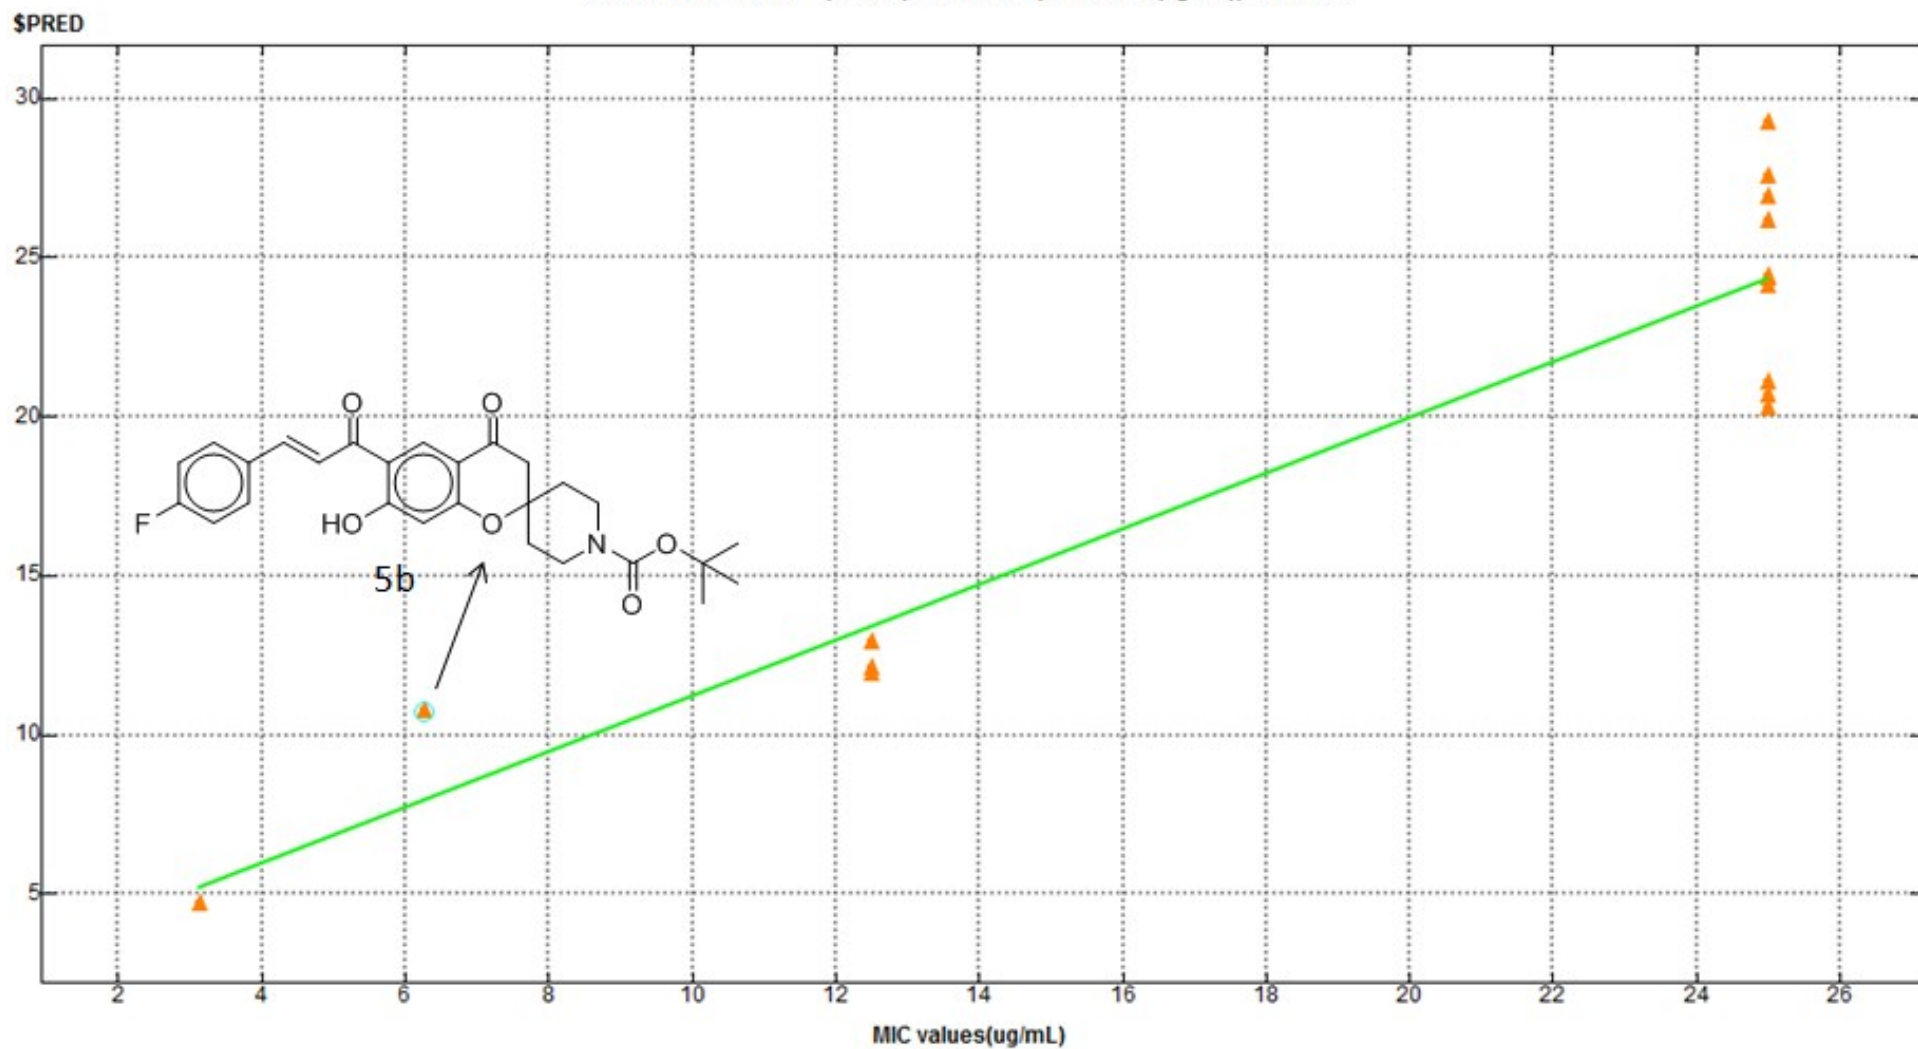

Figure-S2: Correlation plot of 3D Electronic Descriptor QSAR based Predicted Data with Experimental MIC Values

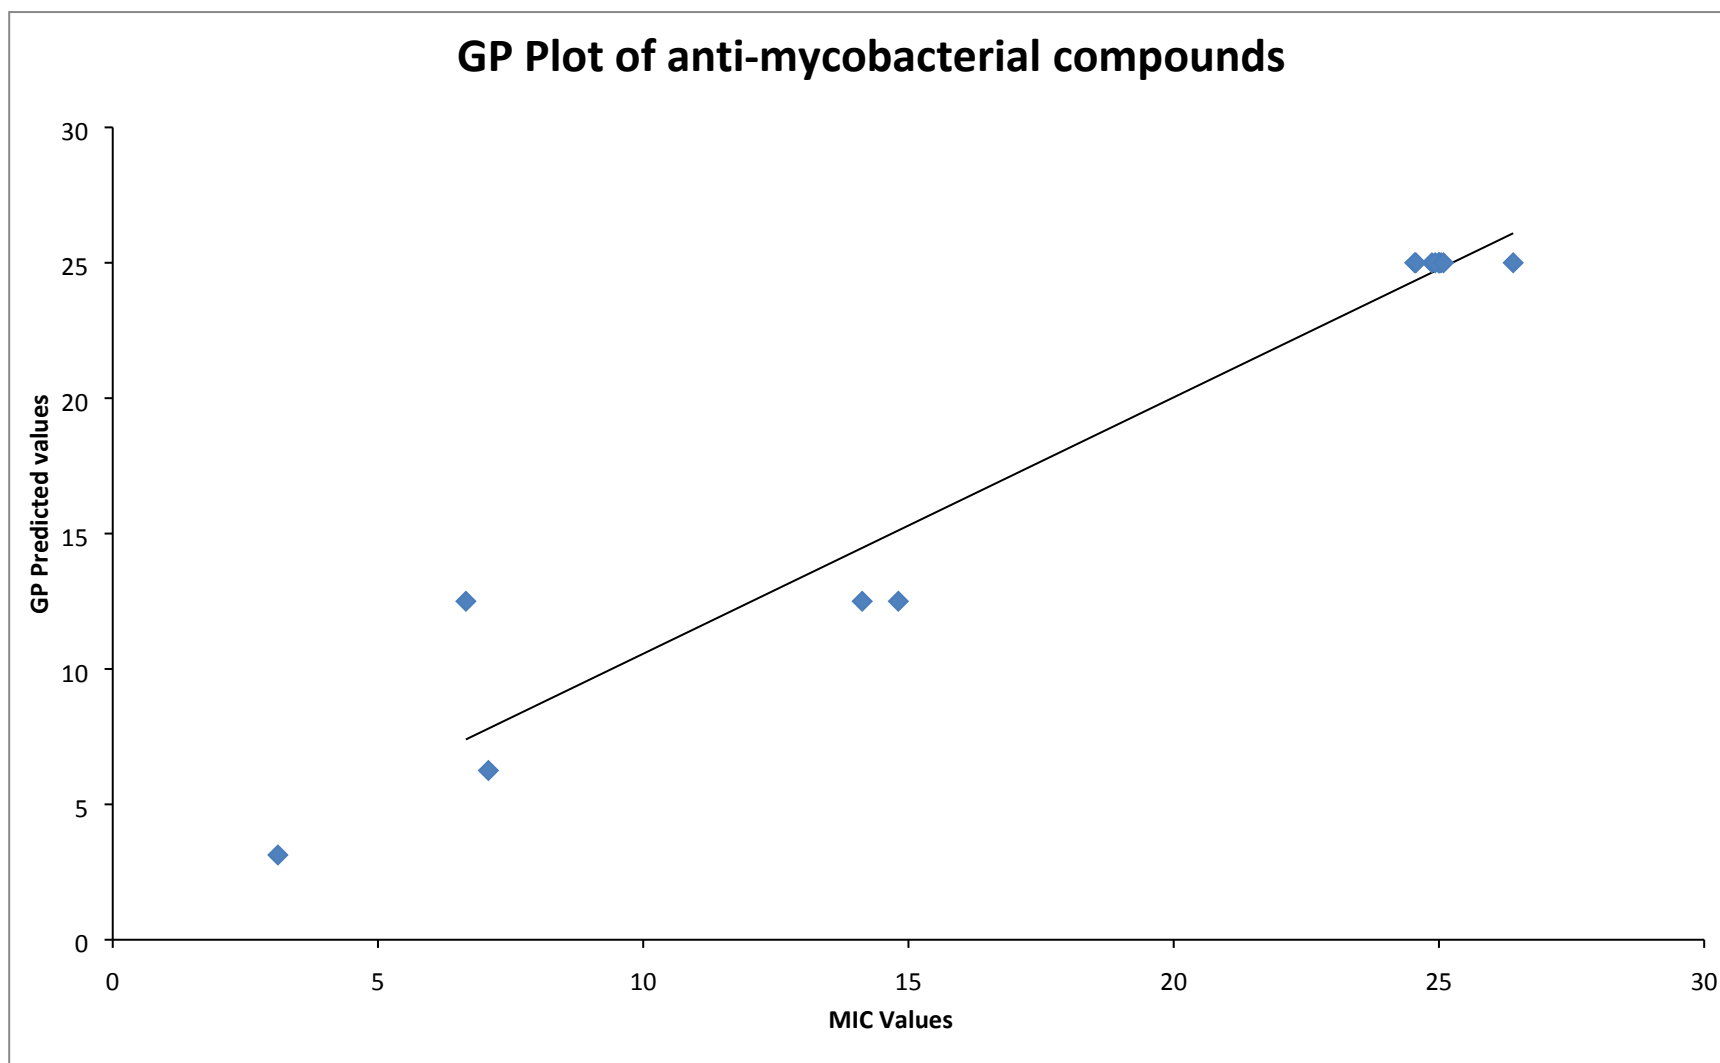

**Figure S3: Parity plot of experimental MIC values with predicted values by GP approach**
